# Supplementary material for: A Cyclic Permutation Approach to Removing Spatial Dependency between Clustered Gene Ontology Terms
Source: Biology (Basel). 2024 Mar 8;13(3):175. doi: 10.3390/biology13030175 (PMC10967837; doi:10.3390/biology13030175)
Supplement: Supplementary file 1 [file biology-13-00175-s001.zip › supp_s1.csv]

TERM	hyper
cellular response to phenylalanine	8
flavonoid glucuronidation	8
response to phenylalanine	8
sensory perception of smell	8
xenobiotic glucuronidation	8
cellular glucuronidation	8
flavonoid metabolic process	8
membrane disruption in other organism	8
sensory perception of chemical stimulus	8
IP-10 production	6
glucuronate metabolic process	6
negative regulation of IP-10 production	6
negative regulation of chemokine (C-X-C motif) ligand 2 production	6
regulation of IP-10 production	6
regulation of ribonuclease activity	6
uronic acid metabolic process	6
natural killer cell activation involved in immune response	5
positive regulation of lactation	5
positive regulation of peptidyl-serine phosphorylation of STAT protein	5
regulation of lactation	5
regulation of peptidyl-serine phosphorylation of STAT protein	5
response to exogenous dsRNA	5
serine phosphorylation of STAT protein	5
detection of chemical stimulus involved in sensory perception of bitter taste	4
mucosal immune response	4
organ or tissue specific immune response	4
response to dsRNA	4
G protein-coupled receptor signaling pathway	3
MHC class II protein complex assembly	3
MHC protein complex assembly	3
antigen processing and presentation of exogenous peptide antigen	3
antigen processing and presentation of exogenous peptide antigen via MHC class II	3
antigen processing and presentation of peptide antigen via MHC class II	3
antigen processing and presentation of peptide or polysaccharide antigen via MHC class II	3
cell wall disruption in other organism	3
cellular response to acid chemical	3
cellular response to amino acid stimulus	3
detection of chemical stimulus involved in sensory perception of taste	3
humoral immune response	3
natural killer cell activation	3
negative regulation of type I interferon-mediated signaling pathway	3
nervous system process	3
peptide antigen assembly with MHC class II protein complex	3
peptide antigen assembly with MHC protein complex	3
regulation of bile acid secretion	3
response to amino acid	3
sensory perception	3
sensory perception of bitter taste	3
sensory perception of taste	3
B cell differentiation	2
B cell proliferation	2
T cell activation involved in immune response	2
adaptive immune response	2
antigen processing and presentation	2
antigen processing and presentation of exogenous antigen	2
antigen processing and presentation of peptide antigen	2
cytokine-mediated signaling pathway	2
innate immune response in mucosa	2
lymphocyte activation involved in immune response	2
positive regulation of cell killing	2
positive regulation of peptidyl-serine phosphorylation	2
regulation of nuclease activity	2
regulation of peptidyl-serine phosphorylation	2
regulation of receptor signaling pathway via JAK-STAT	2
response to acid chemical	2
system process	2
B cell activation	1
T cell mediated cytotoxicity	1
antigen processing and presentation of endogenous antigen	1
antigen processing and presentation of endogenous peptide antigen	1
antigen processing and presentation of endogenous peptide antigen via MHC class I	1
antigen processing and presentation of endogenous peptide antigen via MHC class I via ER pathway	1
antigen processing and presentation of endogenous peptide antigen via MHC class I via ER pathway, TAP-independent	1
antigen processing and presentation of endogenous peptide antigen via MHC class Ib	1
antigen processing and presentation of peptide antigen via MHC class I	1
antigen processing and presentation of peptide antigen via MHC class Ib	1
antigen processing and presentation via MHC class Ib	1
antimicrobial humoral immune response mediated by antimicrobial peptide	1
cellular response to interferon-beta	1
cellular response to leukemia inhibitory factor	1
cellular response to stimulus	1
cellular response to type I interferon	1
cellular response to xenobiotic stimulus	1
defense response to Gram-negative bacterium	1
defense response to Gram-positive bacterium	1
detection of chemical stimulus	1
detection of chemical stimulus involved in sensory perception	1
entry into host	1
epidermal cell differentiation	1
glutathione metabolic process	1
immune response	1
intracellular sequestering of iron ion	1
keratinocyte differentiation	1
leukocyte proliferation	1
lymphocyte proliferation	1
modulation by symbiont of entry into host	1
modulation of process of other organism	1
mononuclear cell differentiation	1
mononuclear cell proliferation	1
negative regulation of cell killing	1
negative regulation of leukocyte mediated cytotoxicity	1
negative regulation of lipid storage	1
negative regulation of natural killer cell mediated cytotoxicity	1
negative regulation of natural killer cell mediated immunity	1
negative regulation of peptidase activity	1
negative regulation of serine-type endopeptidase activity	1
negative regulation of serine-type peptidase activity	1
negative regulation of viral genome replication	1
negative regulation of viral process	1
peptidyl-lysine N6-acetylation	1
peptidyl-serine modification	1
peptidyl-serine phosphorylation	1
positive regulation of T cell mediated cytotoxicity	1
positive regulation of isoprenoid metabolic process	1
positive regulation of leukocyte mediated cytotoxicity	1
positive regulation of monocyte chemotactic protein-1 production	1
positive regulation of receptor signaling pathway via JAK-STAT	1
positive regulation of receptor signaling pathway via STAT	1
positive regulation of retinoic acid biosynthetic process	1
protection from natural killer cell mediated cytotoxicity	1
receptor signaling pathway via JAK-STAT	1
regulation of cell killing	1
regulation of leukocyte mediated cytotoxicity	1
regulation of serine-type endopeptidase activity	1
regulation of serine-type peptidase activity	1
regulation of type I interferon-mediated signaling pathway	1
regulation of viral entry into host cell	1
regulation of viral genome replication	1
response to interferon-alpha	1
response to interferon-beta	1
response to leukemia inhibitory factor	1
response to type I interferon	1
sequestering of iron ion	1
sequestering of metal ion	1
type I interferon signaling pathway	1
viral entry into host cell	1
xenobiotic metabolic process	1
zymogen activation	1
