# Supplementary material for: A Cyclic Permutation Approach to Removing Spatial Dependency between Clustered Gene Ontology Terms
Source: Biology (Basel). 2024 Mar 8;13(3):175. doi: 10.3390/biology13030175 (PMC10967837; doi:10.3390/biology13030175)
Supplement: Supplementary file 1 [file biology-13-00175-s001.zip › supp_s2.xlsx]

## Sheet: asynchronous replication timing
Asynchronous replication timing
GOID: Gene Ontology Identifier. A unique identifier for each Gene Ontology term in the database.
TERM: The full name of the Gene Ontology term associated with the enrichment analysis.
P.value.cyclic: p-value from the cyclic permutation test. Indicates the probability of observing at least the same number of genes from this GO term within the analyzed loci by chance, using cyclic permutations that preserve genomic order.
P.adjust.cyclic.BH: Benjamini-Hochberg adjusted p-value from the cyclic permutation test.
P.adjust.cyclic.Bonfferroni: Bonferroni-adjusted p-value from the cyclic permutation test.
P.value.random: p-value from the random permutation test. Indicates the probability of observing at least the same number of genes from this GO term within the analyzed loci by chance, using random permutations that disrupt genomic order.
P.value.hyper: -value from the hypergeometric test. The conventional enrichment analysis method.
P.adjust.hyper.BH: Benjamini-Hochberg adjusted p-value from the hypergeometric test.
residuals: Distance between the cyclic permutation p-value and the linear regression line between cyclic and random permutation p-values.
b: The number of genes falling within the analyzed loci that belong to the specific GO term
B: The total number of genes across the entire genome belonging to the specific GO term.
n: The total number of genes found within the analyzed loci (regardless of GO term).
GOID	TERM	P.value.cyclic	P.adjust.cyclic.BH	P.adjust.cyclic.Bonfferroni	P.value.random	P.value.hyper	P.adjust.hyper.BH	residuals	b	B	n
GO:0001580	detection of chemical stimulus involved in sensory perception of bitter taste	0.00203402	0.0630547	0.107803	4.62257e-05	2.43443e-18	1.73696e-14	1.34703	25	48	1313
GO:0002429	immune response-activating cell surface receptor signaling pathway	0.00855214	0.196699	0.453264	0.000785873	0.000604606	0.0862772	0.818389	25	203	1313
GO:0002757	immune response-activating signal transduction	0.00633321	0.151997	0.33566	0.000554734	0.000277841	0.0471999	0.822868	26	204	1313
GO:0002764	immune response-regulating signaling pathway	0.00887574	0.196699	0.470414	0.000785873	0.000722043	0.0972034	0.836538	26	217	1313
GO:0003008	system process	0.0582933	0.32757	1	4.62257e-05	1.74665e-05	0.00498495	2.98679	232	2964	1313
GO:0006063	uronic acid metabolic process	0.0195544	0.326738	1	4.62257e-05	7.94014e-07	0.000333252	2.45301	7	11	1313
GO:0006814	sodium ion transport	0.00106324	0.0372134	0.0563517	4.62278e-05	8.84163e-05	0.0188053	1.03	27	201	1313
GO:0006873	cellular ion homeostasis	0.000138683	0.0066568	0.00735022	4.62278e-05	1.6299e-05	0.00484556	0.0346087	70	689	1313
GO:0006874	cellular calcium ion homeostasis	0.00337463	0.0877404	0.178855	0.000554734	0.000525133	0.0764658	0.515231	48	482	1313
GO:0006875	cellular metal ion homeostasis	0.00314349	0.0867234	0.166605	0.000508506	0.00066594	0.0926622	0.518347	57	605	1313
GO:0006885	regulation of pH	0.000277367	0.0122041	0.0147004	0.000138683	8.96116e-05	0.0188053	-0.103783	17	99	1313
GO:0007186	G protein-coupled receptor signaling pathway	0.121348	0.32757	1	0.000323595	0.000265343	0.0461762	2.49996	140	1733	1313
GO:0007567	parturition	9.24556e-05	0.00480769	0.00490015	0.000277367	0.000159251	0.0315627	-0.941687	5	10	1313
GO:0007600	sensory perception	0.054595	0.32757	1	4.62257e-05	3.62952e-08	1.99205e-05	2.95476	158	1703	1313
GO:0007606	sensory perception of chemical stimulus	0.0623151	0.32757	1	4.62257e-05	3.35649e-09	1.99571e-06	3.01939	124	1202	1313
GO:0007608	sensory perception of smell	0.138129	0.32757	1	9.24556e-05	6.67487e-05	0.0158751	3.10733	99	1108	1313
GO:0009593	detection of chemical stimulus	0.00152552	0.0488166	0.0808524	4.62257e-05	4.05413e-12	4.13232e-09	1.20644	32	128	1313
GO:0009812	flavonoid metabolic process	0.018676	0.326738	0.98983	4.62257e-05	9.65313e-08	4.91965e-05	2.43055	7	9	1313
GO:0018003	peptidyl-lysine N6-acetylation	0.0205251	0.326738	1	4.62257e-05	2.98882e-09	1.99571e-06	2.47668	7	7	1313
GO:0019236	response to pheromone	0.0410041	0.326738	1	4.62257e-05	2.29275e-06	0.000860987	2.81486	18	84	1313
GO:0019585	glucuronate metabolic process	0.0195544	0.326738	1	4.62257e-05	7.94014e-07	0.000333252	2.45301	7	11	1313
GO:0030003	cellular cation homeostasis	9.24556e-05	0.00480769	0.00490015	4.62257e-05	7.06437e-06	0.00219149	-0.163515	70	672	1313
GO:0030004	cellular monovalent inorganic cation homeostasis	0.000138683	0.0066568	0.00735022	4.62257e-05	5.98809e-06	0.00197166	0.0346288	20	107	1313
GO:0030638	polyketide metabolic process	0.0277829	0.326738	1	0.000785873	0.000451726	0.0671472	1.39417	5	12	1313
GO:0030641	regulation of cellular pH	9.24556e-05	0.00480769	0.00490015	4.62257e-05	5.86696e-06	0.00197166	-0.163515	17	81	1313
GO:0030647	aminoglycoside antibiotic metabolic process	0.0277829	0.326738	1	0.000785873	0.000451726	0.0671472	1.39417	5	12	1313
GO:0032501	multicellular organismal process	0.0171967	0.326738	0.911428	9.24556e-05	7.00197e-05	0.0161158	2.08917	554	8047	1313
GO:0032607	interferon-alpha production	0.000554734	0.0216346	0.0294009	0.000600962	0.000404767	0.0656366	-0.401875	8	31	1313
GO:0032647	regulation of interferon-alpha production	0.000277367	0.0122041	0.0147004	0.000508506	0.00024546	0.0437839	-0.668054	8	29	1313
GO:0035725	sodium ion transmembrane transport	0.000508506	0.0203402	0.0269508	4.62257e-05	2.12503e-05	0.00583156	0.669567	23	145	1313
GO:0044597	daunorubicin metabolic process	0.0277829	0.326738	1	0.000785873	0.000451726	0.0671472	1.39417	5	12	1313
GO:0044598	doxorubicin metabolic process	0.0277829	0.326738	1	0.000785873	0.000451726	0.0671472	1.39417	5	12	1313
GO:0050801	ion homeostasis	0.00134061	0.04424	0.0710521	9.24556e-05	0.000121868	0.0248437	0.842247	76	814	1313
GO:0050851	antigen receptor-mediated signaling pathway	0.00379068	0.094767	0.200906	0.000323595	0.000215314	0.0393915	0.806129	23	168	1313
GO:0050852	T cell receptor signaling pathway	0.0110947	0.221893	0.588018	0.000600962	0.000320586	0.0531949	1.06209	19	130	1313
GO:0050877	nervous system process	0.0590329	0.32757	1	4.62257e-05	1.96303e-06	0.000778124	2.99295	191	2282	1313
GO:0050896	response to stimulus	0.0104937	0.220368	0.556167	0.000138683	7.92307e-05	0.017666	1.6717	602	8831	1313
GO:0050906	detection of stimulus involved in sensory perception	0.000138683	0.0066568	0.00735022	4.62257e-05	8.5178e-15	1.21549e-11	0.0346288	42	175	1313
GO:0050907	detection of chemical stimulus involved in sensory perception	0.000832101	0.0316198	0.0441013	4.62257e-05	3.04004e-15	5.42268e-12	0.910232	31	95	1313
GO:0050909	sensory perception of taste	0.00309726	0.0867234	0.164155	4.62257e-05	2.85633e-14	3.39665e-11	1.55252	25	66	1313
GO:0050912	detection of chemical stimulus involved in sensory perception of taste	0.00245007	0.0710521	0.129854	4.62257e-05	2.9665e-17	7.05533e-14	1.43797	25	52	1313
GO:0050913	sensory perception of bitter taste	0.00203402	0.0630547	0.107803	4.62257e-05	1.63382e-17	5.82865e-14	1.34703	25	51	1313
GO:0051453	regulation of intracellular pH	9.24556e-05	0.00480769	0.00490015	4.62257e-05	6.0794e-06	0.00197166	-0.163515	16	73	1313
GO:0051606	detection of stimulus	0.000462278	0.0189534	0.0245007	4.62257e-05	3.18522e-09	1.99571e-06	0.622991	45	284	1313
GO:0052695	cellular glucuronidation	0.0190921	0.326738	1	4.62257e-05	3.04797e-07	0.000144982	2.44132	7	10	1313
GO:0052696	flavonoid glucuronidation	0.0180751	0.326738	0.957979	4.62257e-05	2.98882e-09	1.99571e-06	2.41456	7	7	1313
GO:0052697	xenobiotic glucuronidation	0.0180751	0.326738	0.957979	4.62257e-05	2.98882e-09	1.99571e-06	2.41456	7	7	1313
GO:0055067	monovalent inorganic cation homeostasis	0.000231139	0.0104013	0.0122504	4.62278e-05	4.48334e-05	0.0114245	0.284241	24	162	1313
GO:0055080	cation homeostasis	0.000323595	0.013591	0.0171505	4.62278e-05	6.04963e-05	0.0148842	0.448669	73	757	1313
GO:0055082	cellular chemical homeostasis	0.000878328	0.0316198	0.0465514	0.000184911	0.000172687	0.0333005	0.334574	78	850	1313
GO:0098719	sodium ion import across plasma membrane	0.000832101	0.0316198	0.0441013	0.000647189	0.000675324	0.0926622	-0.235916	6	19	1313
GO:0098771	inorganic ion homeostasis	0.00120192	0.0408654	0.0637019	0.000138683	0.000181382	0.0340569	0.612792	72	771	1313
GO:2001224	positive regulation of neuron migration	4.62278e-05	0.00245007	0.00245007	4.62278e-05	2.67693e-05	0.00707405	-0.502265	8	22	1313

## Sheet: PGC
differential replication timing between primordial germ cells and mouse embryonic fibroblasts
GOID: Gene Ontology Identifier. A unique identifier for each Gene Ontology term in the database.
TERM: The full name of the Gene Ontology term associated with the enrichment analysis.
P.value.cyclic: p-value from the cyclic permutation test. Indicates the probability of observing at least the same number of genes from this GO term within the analyzed loci by chance, using cyclic permutations that preserve genomic order.
P.adjust.cyclic.BH: Benjamini-Hochberg adjusted p-value from the cyclic permutation test.
P.adjust.cyclic.Bonfferroni: Bonferroni-adjusted p-value from the cyclic permutation test.
P.value.random: p-value from the random permutation test. Indicates the probability of observing at least the same number of genes from this GO term within the analyzed loci by chance, using random permutations that disrupt genomic order.
P.value.hyper: -value from the hypergeometric test. The conventional enrichment analysis method.
P.adjust.hyper.BH: Benjamini-Hochberg adjusted p-value from the hypergeometric test.
residuals: Distance between the cyclic permutation p-value and the linear regression line between cyclic and random permutation p-values.
b: The number of genes falling within the analyzed loci that belong to the specific GO term
B: The total number of genes across the entire genome belonging to the specific GO term.
n: The total number of genes found within the analyzed loci (regardless of GO term).
GOID	TERM	P.value.cyclic	P.adjust.cyclic.BH	P.value.random	P.adjust.cyclic.Bonfferroni	P.value.hyper	P.adjust.hyper.BH	residuals	b	B	n
GO:0001709	cell fate determination	4.62278e-05	0.0086446	4.62257e-05	0.0086446	1.87767e-06	0.000310343	-0.762	17	41	2599
GO:0001935	endothelial cell proliferation	0.00600962	0.387482	4.62257e-05	1	6.6643e-06	0.000996577	1.75479	43	180	2599
GO:0001936	regulation of endothelial cell proliferation	0.00906065	0.411428	4.62257e-05	1	9.4641e-06	0.00133077	1.96708	40	165	2599
GO:0001937	negative regulation of endothelial cell proliferation	0.0019878	0.230584	4.62257e-05	0.371718	9.68424e-12	7.01809e-09	1.18275	31	69	2599
GO:0002009	morphogenesis of an epithelium	0.00120192	0.163462	0.000462278	0.22476	0.000325329	0.025974	-0.0773992	97	575	2599
GO:0002088	lens development in camera-type eye	0.00767382	0.404262	0.00161797	1	0.00194883	0.0981812	0.3371	21	90	2599
GO:0002250	adaptive immune response	0.0168269	0.41189	0.000138683	1	0.000108867	0.0104657	1.81002	69	368	2599
GO:0002285	lymphocyte activation involved in immune response	0.0124815	0.41189	0.000184911	1	0.000213351	0.0186458	1.53062	44	213	2599
GO:0002286	T cell activation involved in immune response	0.0132674	0.41189	4.62257e-05	1	1.31302e-05	0.00167161	2.16427	32	122	2599
GO:0002320	lymphoid progenitor cell differentiation	0.000600962	0.0925481	0.0011557	0.11238	0.000864543	0.0556472	-0.833736	9	23	2599
GO:0002323	natural killer cell activation involved in immune response	0.00429919	0.326738	4.62257e-05	0.803948	6.71642e-13	6.32754e-10	1.58161	24	40	2599
GO:0002366	leukocyte activation involved in immune response	0.0242696	0.41189	0.00171043	1	0.00154427	0.0881731	0.908311	55	307	2599
GO:0002376	immune system process	0.019693	0.41189	0.000924556	1	0.00115129	0.0686473	1.06744	349	2506	2599
GO:0002682	regulation of immune system process	0.0119268	0.411428	0.00240385	1	0.00166712	0.0916863	0.393172	196	1339	2599
GO:0003008	system process	0.0749353	0.674418	4.62257e-05	1	1.59735e-06	0.000283936	3.05946	435	2964	2599
GO:0003279	cardiac septum development	0.00129438	0.172152	0.00134061	0.242049	0.00113132	0.0683217	-0.501479	28	128	2599
GO:0006928	movement of cell or subcellular component	0.0124815	0.41189	0.00194157	1	0.0018375	0.0956415	0.509433	298	2126	2599
GO:0006935	chemotaxis	0.000832101	0.123151	4.62257e-05	0.155603	4.93213e-05	0.00510611	0.732486	103	588	2599
GO:0006936	muscle contraction	0.000693417	0.104706	0.000323595	0.129669	0.00037798	0.0294293	-0.206902	57	303	2599
GO:0006939	smooth muscle contraction	0.00203402	0.233913	0.00189534	0.380362	0.00171572	0.0916863	-0.418163	25	113	2599
GO:0006940	regulation of smooth muscle contraction	0.00101701	0.142382	0.00110947	0.190181	0.000864078	0.0556472	-0.543987	18	68	2599
GO:0006955	immune response	0.0177515	0.41189	9.24556e-05	1	0.0002281	0.0197149	2.01377	225	1504	2599
GO:0006959	humoral immune response	0.0104937	0.411428	4.62257e-05	1	5.65188e-06	0.000858812	2.04301	54	244	2599
GO:0007154	cell communication	0.00536243	0.367604	4.62257e-05	1	8.98433e-09	3.54491e-06	1.69588	889	6362	2599
GO:0007165	signal transduction	0.00693417	0.395248	4.62257e-05	1	3.634e-09	1.63028e-06	1.82878	811	5716	2599
GO:0007166	cell surface receptor signaling pathway	0.000462278	0.0739645	4.62257e-05	0.086446	2.07865e-06	0.000337637	0.428567	369	2469	2599
GO:0007186	G protein-coupled receptor signaling pathway	0.149223	0.693417	4.62278e-05	1	3.31464e-05	0.00367379	3.4156	262	1733	2599
GO:0007218	neuropeptide signaling pathway	0.00041605	0.0674001	0.000323595	0.0778014	0.000279395	0.0235739	-0.471028	20	73	2599
GO:0007259	receptor signaling pathway via JAK-STAT	9.24556e-05	0.0169194	4.62257e-05	0.0172892	9.7251e-17	1.527e-13	-0.403604	66	187	2599
GO:0007275	multicellular organism development	0.00235762	0.252265	4.62278e-05	0.440875	8.51805e-05	0.00835922	1.27096	700	5177	2599
GO:0007411	axon guidance	0.00628698	0.387482	0.00240385	1	0.00191686	0.0970899	0.0620981	46	249	2599
GO:0007565	female pregnancy	0.00189534	0.221755	4.62257e-05	0.354429	1.43566e-07	3.29886e-05	1.15813	44	163	2599
GO:0007589	body fluid secretion	0.0086446	0.411428	4.62257e-05	1	4.1908e-08	1.12804e-05	1.94278	35	111	2599
GO:0007595	lactation	0.00984652	0.411428	4.62257e-05	1	1.24161e-10	7.79816e-08	2.01009	27	59	2599
GO:0007600	sensory perception	0.138683	0.693417	4.62257e-05	1	1.28196e-05	0.00166102	3.37775	261	1703	2599
GO:0007606	sensory perception of chemical stimulus	0.202616	0.693417	9.24556e-05	1	0.000140601	0.0133798	3.27272	186	1202	2599
GO:0007608	sensory perception of smell	0.214821	0.693417	0.000554734	1	0.000295619	0.0242176	2.52481	171	1108	2599
GO:0008283	cell population proliferation	4.62278e-05	0.0086446	4.62257e-05	0.0086446	3.00541e-09	1.49021e-06	-0.762	331	2047	2599
GO:0008284	positive regulation of cell population proliferation	0.000924556	0.130362	4.62278e-05	0.172892	1.28707e-05	0.00166102	0.786944	164	995	2599
GO:0008285	negative regulation of cell population proliferation	0.00106324	0.14779	9.24556e-05	0.198826	5.13238e-05	0.00525567	0.558178	126	749	2599
GO:0008544	epidermis development	0.00263499	0.266966	0.000277367	0.492742	0.000285779	0.0236168	0.550316	59	313	2599
GO:0009605	response to external stimulus	0.0132212	0.41189	0.000600962	1	0.000822357	0.0538016	1.04851	357	2556	2599
GO:0009913	epidermal cell differentiation	0.00624075	0.387482	0.000277367	1	0.000520297	0.03658	0.996134	40	196	2599
GO:0009966	regulation of signal transduction	0.000554734	0.0865385	4.62257e-05	0.103735	7.61018e-06	0.00112024	0.522838	407	2793	2599
GO:0009967	positive regulation of signal transduction	0.000323595	0.0543639	4.62257e-05	0.0605122	1.70094e-06	0.000291356	0.244146	242	1520	2599
GO:0010033	response to organic substance	0.00355954	0.299001	0.000138683	0.665634	0.000167722	0.0153409	1.00685	437	3123	2599
GO:0010466	negative regulation of peptidase activity	0.00221893	0.244083	4.62257e-05	0.414941	9.03067e-09	3.54491e-06	1.23963	53	197	2599
GO:0010646	regulation of cell communication	0.000508506	0.0803439	4.62257e-05	0.0950906	1.48845e-05	0.00182113	0.477848	474	3330	2599
GO:0010647	positive regulation of cell communication	0.000277367	0.0471524	4.62257e-05	0.0518676	2.49402e-06	0.00039824	0.164441	287	1859	2599
GO:0010951	negative regulation of endopeptidase activity	0.00832101	0.411428	4.62257e-05	1	1.29939e-06	0.000244831	1.92305	45	181	2599
GO:0014013	regulation of gliogenesis	0.000323595	0.0543639	0.000231139	0.0605122	0.000512421	0.0362971	-0.454844	29	128	2599
GO:0014028	notochord formation	0.00355954	0.299001	0.00101701	0.665634	0.000939772	0.0582473	0.141551	4	5	2599
GO:0014046	dopamine secretion	0.00143306	0.184865	0.00101701	0.267983	0.000919956	0.0573967	-0.328876	13	42	2599
GO:0014059	regulation of dopamine secretion	0.00143306	0.184865	0.00101701	0.267983	0.000919956	0.0573967	-0.328876	13	42	2599
GO:0014070	response to organic cyclic compound	0.0111871	0.411428	0.00175666	1	0.00166673	0.0916863	0.496289	120	771	2599
GO:0016107	sesquiterpenoid catabolic process	0.0808062	0.674418	0.00143306	1	0.00173232	0.0916863	1.60708	3	3	2599
GO:0016137	glycoside metabolic process	0.000369822	0.0606509	4.62257e-05	0.0691568	6.43611e-09	2.75612e-06	0.313189	14	21	2599
GO:0016487	farnesol metabolic process	0.0808062	0.674418	0.00143306	1	0.00173232	0.0916863	1.60708	3	3	2599
GO:0016488	farnesol catabolic process	0.0808062	0.674418	0.00143306	1	0.00173232	0.0916863	1.60708	3	3	2599
GO:0018101	protein citrullination	0.0574612	0.632073	4.62257e-05	1	2.49446e-05	0.00290127	2.92218	5	5	2599
GO:0018149	peptide cross-linking	0.0266734	0.41189	9.24556e-05	1	0.000101285	0.00983716	2.22432	14	39	2599
GO:0018195	peptidyl-arginine modification	0.00827478	0.411428	0.000277367	1	0.000362909	0.0284914	1.142	10	25	2599
GO:0019221	cytokine-mediated signaling pathway	0.00203402	0.233913	4.62257e-05	0.380362	1.7944e-06	0.000301875	1.19464	78	383	2599
GO:0023051	regulation of signaling	0.000508506	0.0803439	4.62257e-05	0.0950906	9.75244e-06	0.00135114	0.477848	477	3340	2599
GO:0023052	signaling	0.00434541	0.326738	4.62257e-05	0.812592	3.42992e-09	1.61566e-06	1.58714	886	6309	2599
GO:0023056	positive regulation of signaling	0.000231139	0.0402182	4.62257e-05	0.043223	1.67195e-06	0.000291356	0.0701707	289	1865	2599
GO:0030101	natural killer cell activation	0.0033284	0.296228	4.62257e-05	0.622411	6.27447e-08	1.55557e-05	1.44928	32	98	2599
GO:0030183	B cell differentiation	0.02353	0.41189	0.00041605	1	0.000426705	0.0319047	1.50627	35	163	2599
GO:0030216	keratinocyte differentiation	0.0189996	0.41189	0.000924556	1	0.00100428	0.0614372	1.0489	26	115	2599
GO:0030593	neutrophil chemotaxis	0.00342086	0.297615	4.62278e-05	0.6397	2.3466e-05	0.0027984	1.46343	27	98	2599
GO:0030638	polyketide metabolic process	0.00291235	0.282498	4.62257e-05	0.54461	3.23421e-08	9.23319e-06	1.38024	10	12	2599
GO:0030647	aminoglycoside antibiotic metabolic process	0.00291235	0.282498	4.62257e-05	0.54461	3.23421e-08	9.23319e-06	1.38024	10	12	2599
GO:0030879	mammary gland development	0.00152552	0.189164	4.62257e-05	0.285272	2.5978e-08	8.43926e-06	1.04589	46	165	2599
GO:0032501	multicellular organismal process	0.000832101	0.123151	4.62257e-05	0.155603	9.74856e-10	5.10229e-07	0.732486	1107	8047	2599
GO:0032879	regulation of localization	0.00822855	0.411428	0.000693417	1	0.000639199	0.0436369	0.741165	392	2820	2599
GO:0033135	regulation of peptidyl-serine phosphorylation	0.00471524	0.344212	4.62257e-05	0.881749	1.49807e-06	0.000276731	1.62937	42	165	2599
GO:0033138	positive regulation of peptidyl-serine phosphorylation	0.00642567	0.387482	4.62257e-05	1	7.96772e-07	0.00015971	1.7894	36	129	2599
GO:0033139	regulation of peptidyl-serine phosphorylation of STAT protein	0.00337463	0.296967	4.62257e-05	0.631056	1.868e-15	2.1998e-12	1.45641	23	31	2599
GO:0033141	positive regulation of peptidyl-serine phosphorylation of STAT protein	0.00711908	0.395248	4.62257e-05	1	9.54418e-16	1.28451e-12	1.84239	22	28	2599
GO:0033603	positive regulation of dopamine secretion	0.000231139	0.0402182	0.000277367	0.043223	0.000407829	0.031237	-0.708001	6	10	2599
GO:0034097	response to cytokine	0.000184911	0.0330991	4.62257e-05	0.0345784	1.0361e-07	2.44028e-05	-0.0452072	177	1010	2599
GO:0034308	primary alcohol metabolic process	0.0137759	0.41189	0.000924556	1	0.00132967	0.0778062	0.882671	19	76	2599
GO:0035025	positive regulation of Rho protein signal transduction	0.00517751	0.367604	0.000554734	0.968195	0.000512357	0.0362971	0.59853	12	35	2599
GO:0035295	tube development	0.00226516	0.246903	0.000924556	0.423585	0.000868287	0.0556472	-0.050758	170	1126	2599
GO:0036414	histone citrullination	0.0574612	0.632073	4.62257e-05	1	2.49446e-05	0.00290127	2.92218	5	5	2599
GO:0040011	locomotion	0.00485392	0.349482	0.000508506	0.907683	0.000460883	0.0339217	0.602949	272	1880	2599
GO:0042100	B cell proliferation	0.019277	0.41189	4.62257e-05	1	2.25341e-05	0.00272172	2.35745	30	114	2599
GO:0042110	T cell activation	0.0139608	0.41189	0.00110947	1	0.000988909	0.0608922	0.810384	89	537	2599
GO:0042127	regulation of cell population proliferation	0.00041605	0.0674001	4.62257e-05	0.0778014	2.69158e-05	0.00309237	0.37409	260	1713	2599
GO:0042221	response to chemical	0.0041605	0.320913	0.000231139	0.778014	0.000146543	0.0138058	0.865667	563	4109	2599
GO:0042270	protection from natural killer cell mediated cytotoxicity	0.00892197	0.411428	4.62257e-05	1	1.54479e-06	0.000279874	1.95911	8	10	2599
GO:0042330	taxis	0.000785873	0.117095	4.62257e-05	0.146958	4.32474e-05	0.00462993	0.702932	104	593	2599
GO:0042501	serine phosphorylation of STAT protein	0.00526997	0.367604	4.62257e-05	0.985484	2.98711e-13	3.12684e-10	1.68688	23	36	2599
GO:0043086	negative regulation of catalytic activity	0.00970784	0.411428	0.000231139	1	0.000305286	0.024794	1.30377	98	581	2599
GO:0043270	positive regulation of ion transport	0.000184911	0.0330991	9.24556e-05	0.0345784	0.00015768	0.0145637	-0.346257	62	326	2599
GO:0043330	response to exogenous dsRNA	0.00351331	0.298632	4.62257e-05	0.65699	2.72643e-11	1.83469e-08	1.47723	27	56	2599
GO:0043331	response to dsRNA	0.00587093	0.387482	4.62257e-05	1	7.72919e-10	4.28333e-07	1.74272	27	63	2599
GO:0043588	skin development	0.00309726	0.282498	0.000369822	0.579188	0.000213751	0.0186458	0.508955	54	277	2599
GO:0044057	regulation of system process	0.00217271	0.24117	0.000462278	0.406296	0.000399907	0.0308814	0.228725	105	635	2599
GO:0044092	negative regulation of molecular function	0.0094767	0.411428	0.00106324	1	0.000903364	0.0571181	0.62855	144	934	2599
GO:0044597	daunorubicin metabolic process	0.00291235	0.282498	4.62257e-05	0.54461	3.23421e-08	9.23319e-06	1.38024	10	12	2599
GO:0044598	doxorubicin metabolic process	0.00291235	0.282498	4.62257e-05	0.54461	3.23421e-08	9.23319e-06	1.38024	10	12	2599
GO:0044706	multi-multicellular organism process	0.000878328	0.128236	4.62257e-05	0.164247	3.89153e-08	1.0783e-05	0.760442	51	194	2599
GO:0045664	regulation of neuron differentiation	0.00184911	0.220044	0.00143306	0.345784	0.00171435	0.0916863	-0.346022	45	241	2599
GO:0045665	negative regulation of neuron differentiation	0.00134061	0.17696	0.000508506	0.250693	0.000800616	0.0527455	-0.0623297	22	90	2599
GO:0045666	positive regulation of neuron differentiation	0.000693417	0.104706	0.000600962	0.129669	0.000766484	0.0508743	-0.475748	27	119	2599
GO:0045669	positive regulation of osteoblast differentiation	0.000554734	0.0865385	0.000924556	0.103735	0.00049707	0.0362971	-0.778212	20	76	2599
GO:0045685	regulation of glial cell differentiation	9.24556e-05	0.0169194	0.000184911	0.0172892	0.00028061	0.0235739	-1.00568	24	95	2599
GO:0045687	positive regulation of glial cell differentiation	0.00152552	0.189164	0.00157175	0.285272	0.00163769	0.0916863	-0.485606	15	55	2599
GO:0045861	negative regulation of proteolysis	0.00143306	0.184865	4.62257e-05	0.267983	7.29022e-08	1.76106e-05	1.01357	68	295	2599
GO:0045933	positive regulation of muscle contraction	0.00147929	0.186391	0.00157175	0.276627	0.00142239	0.0822105	-0.501517	14	49	2599
GO:0046425	regulation of receptor signaling pathway via JAK-STAT	0.000231139	0.0402182	4.62257e-05	0.043223	1.41916e-20	7.50707e-17	0.0701707	57	126	2599
GO:0046427	positive regulation of receptor signaling pathway via JAK-STAT	0.00374445	0.299556	4.62257e-05	0.700213	1.92431e-12	1.64809e-09	1.51018	30	62	2599
GO:0046903	secretion	0.00522374	0.367604	0.000462278	0.97684	0.000630295	0.0433431	0.682308	160	1044	2599
GO:0048245	eosinophil chemotaxis	0.0516827	0.620192	0.00180288	1	0.00152621	0.0876733	1.27629	7	16	2599
GO:0048513	animal organ development	0.000323595	0.0543639	4.62257e-05	0.0605122	4.95283e-06	0.000764929	0.244146	506	3544	2599
GO:0048518	positive regulation of biological process	0.0069804	0.395248	0.000693417	1	0.000756038	0.0508743	0.656107	819	6237	2599
GO:0048522	positive regulation of cellular process	0.0102626	0.411428	0.00180288	1	0.00168073	0.0916863	0.440406	749	5712	2599
GO:0048562	embryonic organ morphogenesis	0.00258876	0.266966	0.000462278	0.484098	0.000359265	0.0284423	0.319315	61	329	2599
GO:0048565	digestive tract development	0.00110947	0.151997	0.000970784	0.20747	0.000766813	0.0508743	-0.441005	28	125	2599
GO:0048583	regulation of response to stimulus	0.000369822	0.0606509	4.62278e-05	0.0691568	8.25994e-06	0.00119718	0.313169	520	3669	2599
GO:0048584	positive regulation of response to stimulus	0.000184911	0.0330991	4.62257e-05	0.0345784	1.11924e-05	0.00150634	-0.0452072	315	2104	2599
GO:0048664	neuron fate determination	0.000184911	0.0330991	0.000184911	0.0345784	0.000181667	0.0164566	-0.647287	6	9	2599
GO:0048709	oligodendrocyte differentiation	0.00157175	0.190181	0.000554734	0.293916	0.000502995	0.0362971	-0.0178728	27	116	2599
GO:0048713	regulation of oligodendrocyte differentiation	0.00120192	0.163462	0.000600962	0.22476	0.000536501	0.0372177	-0.191343	16	55	2599
GO:0048731	system development	0.00184911	0.220044	4.62278e-05	0.345784	4.68548e-05	0.00495977	1.14534	655	4794	2599
GO:0048732	gland development	0.00342086	0.297615	0.000138683	0.6397	5.74304e-05	0.00581776	0.986305	86	474	2599
GO:0048856	anatomical structure development	0.0105399	0.411428	0.000878328	1	0.000888794	0.0565765	0.766506	753	5711	2599
GO:0050673	epithelial cell proliferation	0.000231139	0.0402182	4.62257e-05	0.043223	1.92384e-08	6.47303e-06	0.0701707	98	467	2599
GO:0050678	regulation of epithelial cell proliferation	0.000600962	0.0925481	4.62257e-05	0.11238	7.46386e-07	0.000152863	0.564224	82	400	2599
GO:0050680	negative regulation of epithelial cell proliferation	0.000184911	0.0330991	4.62257e-05	0.0345784	2.78764e-10	1.6414e-07	-0.0452072	51	170	2599
GO:0050767	regulation of neurogenesis	0.00369822	0.299556	0.0016642	0.691568	0.00179845	0.0941289	-0.052566	75	448	2599
GO:0050789	regulation of biological process	0.00587093	0.387482	4.62278e-05	1	2.79609e-05	0.00316506	1.7427	1467	11407	2599
GO:0050794	regulation of cellular process	0.00647189	0.387482	4.62257e-05	1	1.38401e-05	0.00171562	1.79311	1406	10865	2599
GO:0050802	circadian sleep/wake cycle, sleep	0.00235762	0.252265	0.00194157	0.440875	0.00189684	0.0970899	-0.352292	10	30	2599
GO:0050877	nervous system process	0.147236	0.693417	0.000277367	1	0.000188888	0.0169478	2.63052	328	2282	2599
GO:0050878	regulation of body fluid levels	0.000878328	0.128236	4.62257e-05	0.164247	3.83118e-07	8.35364e-05	0.760442	73	338	2599
GO:0050896	response to stimulus	0.00147929	0.186391	4.62257e-05	0.276627	9.92603e-09	3.74053e-06	1.02998	1194	8831	2599
GO:0050911	detection of chemical stimulus involved in sensory perception of smell	0.0141919	0.41189	4.62257e-05	1	1.10731e-05	0.00150634	2.19911	14	33	2599
GO:0051046	regulation of secretion	0.00175666	0.210799	4.62257e-05	0.328495	4.26022e-05	0.00461328	1.11884	127	753	2599
GO:0051047	positive regulation of secretion	0.000277367	0.0471524	4.62257e-05	0.0518676	4.34829e-08	1.13792e-05	0.164441	88	412	2599
GO:0051049	regulation of transport	0.00998521	0.411428	0.000970784	1	0.00121867	0.0717565	0.695085	261	1826	2599
GO:0051050	positive regulation of transport	0.000323595	0.0543639	4.62257e-05	0.0605122	8.62175e-07	0.00016922	0.244146	178	1049	2599
GO:0051239	regulation of multicellular organismal process	0.000878328	0.128236	4.62257e-05	0.164247	5.97858e-05	0.00599194	0.760442	407	2855	2599
GO:0051240	positive regulation of multicellular organismal process	0.000647189	0.0983728	4.62278e-05	0.121024	7.10306e-05	0.00704399	0.602522	246	1632	2599
GO:0051336	regulation of hydrolase activity	0.00134061	0.17696	4.62257e-05	0.250693	1.19122e-05	0.00158064	0.979083	145	859	2599
GO:0051346	negative regulation of hydrolase activity	0.0028199	0.27635	4.62257e-05	0.527321	8.87e-07	0.000170539	1.36356	65	296	2599
GO:0051716	cellular response to stimulus	0.00411428	0.320913	4.62257e-05	0.769369	1.14974e-08	4.16604e-06	1.55888	1021	7429	2599
GO:0051960	regulation of nervous system development	0.00152552	0.189164	0.000508506	0.285272	0.00050577	0.0362971	0.00448013	92	547	2599
GO:0051962	positive regulation of nervous system development	0.00212648	0.240292	0.00171043	0.397652	0.00178034	0.0937014	-0.350597	62	357	2599
GO:0052547	regulation of peptidase activity	0.00762759	0.404262	4.62278e-05	1	2.82205e-05	0.00316506	1.87804	73	379	2599
GO:0052548	regulation of endopeptidase activity	0.0184911	0.41189	0.000231139	1	0.00041809	0.0317647	1.63694	64	351	2599
GO:0060017	parathyroid gland development	0.00106324	0.14779	0.00041605	0.198826	0.000424505	0.0319047	-0.0950341	5	7	2599
GO:0061614	pri-miRNA transcription by RNA polymerase II	0.0312038	0.41189	4.62257e-05	1	1.36694e-05	0.00171562	2.60648	25	85	2599
GO:0065007	biological regulation	0.00545488	0.367604	9.24556e-05	1	4.89143e-05	0.00510611	1.40366	1538	12029	2599
GO:0065009	regulation of molecular function	0.00591716	0.387482	0.000462278	1	0.000537269	0.0372177	0.746755	339	2401	2599
GO:0070098	chemokine-mediated signaling pathway	0.000462278	0.0739645	4.62257e-05	0.086446	5.44359e-08	1.38606e-05	0.428567	23	57	2599
GO:0070494	regulation of thrombin-activated receptor signaling pathway	0.00254253	0.266966	0.00161797	0.475453	0.00173232	0.0916863	-0.234069	3	3	2599
GO:0070495	negative regulation of thrombin-activated receptor signaling pathway	0.00254253	0.266966	0.00161797	0.475453	0.00173232	0.0916863	-0.234069	3	3	2599
GO:0071310	cellular response to organic substance	0.00725777	0.395248	0.00129438	1	0.00112687	0.0683217	0.405188	345	2474	2599
GO:0071345	cellular response to cytokine stimulus	0.000138683	0.0251017	4.62257e-05	0.0259338	1.66849e-08	5.82181e-06	-0.193955	166	910	2599
GO:0071621	granulocyte chemotaxis	0.0144231	0.41189	0.0011557	1	0.00114307	0.0685915	0.809499	27	122	2599
GO:0072189	ureter development	0.00212648	0.240292	0.00171043	0.397652	0.00141927	0.0822105	-0.350597	8	20	2599
GO:0086002	cardiac muscle cell action potential involved in contraction	0.00295858	0.282498	0.000832101	0.553254	0.00117534	0.069641	0.133086	13	43	2599
GO:0086065	cell communication involved in cardiac conduction	0.00134061	0.17696	0.000600962	0.250693	0.000712715	0.0483057	-0.13488	13	41	2599
GO:0097485	neuron projection guidance	0.00628698	0.387482	0.00240385	1	0.00191686	0.0970899	0.0620981	46	249	2599
GO:0097530	granulocyte migration	0.0158099	0.41189	0.00212648	1	0.00188847	0.0970899	0.592151	31	151	2599
GO:0097696	receptor signaling pathway via STAT	4.62278e-05	0.0086446	4.62257e-05	0.0086446	1.22352e-17	2.30535e-14	-0.762	69	194	2599
GO:0098904	regulation of AV node cell action potential	4.62278e-05	0.0086446	0.000184911	0.0086446	0.00020791	0.0184785	-1.36408	4	4	2599
GO:0099622	cardiac muscle cell membrane repolarization	0.00397559	0.314072	0.00212648	0.743436	0.00189684	0.0970899	-0.121627	10	30	2599
GO:1901624	negative regulation of lymphocyte chemotaxis	0.0106324	0.411428	0.00138683	1	0.00173232	0.0916863	0.572654	3	3	2599
GO:1901657	glycosyl compound metabolic process	0.00231139	0.24963	0.000600962	0.43223	0.000447001	0.033159	0.146775	19	70	2599
GO:1901661	quinone metabolic process	0.00434541	0.326738	0.000462278	0.812592	0.000309598	0.0249292	0.587121	13	38	2599
GO:1902644	tertiary alcohol metabolic process	0.00268121	0.268121	4.62257e-05	0.501387	3.31596e-06	0.000520661	1.33748	12	23	2599
GO:1902893	regulation of pri-miRNA transcription by RNA polymerase II	0.0291235	0.41189	4.62257e-05	1	8.61643e-06	0.00122993	2.5708	25	83	2599
GO:1902895	positive regulation of pri-miRNA transcription by RNA polymerase II	0.0204327	0.41189	4.62257e-05	1	1.78138e-07	3.9958e-05	2.38755	25	69	2599
GO:1903487	regulation of lactation	0.00295858	0.282498	4.62257e-05	0.553254	9.37709e-19	2.20854e-15	1.38838	24	28	2599
GO:1903489	positive regulation of lactation	0.00258876	0.266966	4.62257e-05	0.484098	1.51253e-19	4.74984e-16	1.31934	24	27	2599
GO:1904892	regulation of receptor signaling pathway via STAT	0.000138683	0.0251017	4.62257e-05	0.0259338	1.59369e-20	7.50707e-17	-0.193955	59	134	2599
GO:1904894	positive regulation of receptor signaling pathway via STAT	0.00355954	0.299001	4.62257e-05	0.665634	6.02452e-12	4.72975e-09	1.48399	31	68	2599
GO:1990266	neutrophil migration	0.00277367	0.274593	4.62257e-05	0.518676	4.13297e-05	0.00452752	1.35501	31	123	2599
GO:1990823	response to leukemia inhibitory factor	0.00859837	0.411428	0.000277367	1	0.000282757	0.0235739	1.16184	54	280	2599
GO:1990830	cellular response to leukemia inhibitory factor	0.00804364	0.410226	0.000231139	1	0.000257797	0.0220791	1.20653	54	279	2599
GO:1990868	response to chemokine	0.000878328	0.128236	4.62257e-05	0.164247	3.99017e-07	8.35364e-05	0.760442	24	67	2599
GO:1990869	cellular response to chemokine	0.000878328	0.128236	4.62257e-05	0.164247	3.99017e-07	8.35364e-05	0.760442	24	67	2599
GO:2000026	regulation of multicellular organismal development	0.00120192	0.163462	0.000138683	0.22476	0.000153587	0.0143262	0.44548	223	1479	2599
GO:2000866	positive regulation of estradiol secretion	0.00309726	0.282498	0.0016642	0.579188	0.00173232	0.0916863	-0.144258	3	3	2599

## Sheet: H3K9me3
H3K9me3
GOID: Gene Ontology Identifier. A unique identifier for each Gene Ontology term in the database.
TERM: The full name of the Gene Ontology term associated with the enrichment analysis.
P.value.cyclic: p-value from the cyclic permutation test. Indicates the probability of observing at least the same number of genes from this GO term within the analyzed loci by chance, using cyclic permutations that preserve genomic order.
P.adjust.cyclic.BH: Benjamini-Hochberg adjusted p-value from the cyclic permutation test.
P.adjust.cyclic.Bonfferroni: Bonferroni-adjusted p-value from the cyclic permutation test.
P.value.random: p-value from the random permutation test. Indicates the probability of observing at least the same number of genes from this GO term within the analyzed loci by chance, using random permutations that disrupt genomic order.
P.value.hyper: -value from the hypergeometric test. The conventional enrichment analysis method.
P.adjust.hyper.BH: Benjamini-Hochberg adjusted p-value from the hypergeometric test.
residuals: Distance between the cyclic permutation p-value and the linear regression line between cyclic and random permutation p-values.
b: The number of genes falling within the analyzed loci that belong to the specific GO term
B: The total number of genes across the entire genome belonging to the specific GO term.
n: The total number of genes found within the analyzed loci (regardless of GO term).
GOID	TERM	P.value.cyclic	P.adjust.cyclic.BH	P.adjust.cyclic.Bonfferroni	P.value.random	P.value.hyper	P.adjust.hyper.BH	residuals	b	n	B
GO:0007186	G protein-coupled receptor signaling pathway	0.108342	0.811585	1	4.07897e-05	4.98138e-07	0.00018895	3.32262	131	1207	1732
GO:0007606	sensory perception of chemical stimulus	0.137793	0.811585	1	4.07897e-05	2.88035e-07	0.000127635	3.4427	99	1207	1198
GO:0007608	sensory perception of smell	0.129349	0.811585	1	4.07897e-05	3.96467e-08	4.01026e-05	3.41112	96	1207	1103
GO:0010466	negative regulation of peptidase activity	0.0707322	0.811585	1	0.000407914	0.00036746	0.0969614	2.10967	22	1207	200
GO:0010951	negative regulation of endopeptidase activity	0.0633898	0.811585	1	8.15827e-05	0.000110964	0.030611	2.75391	22	1207	184
GO:0016540	protein autoprocessing	0.037732	0.811585	0.905568	4.07897e-05	2.6409e-06	0.000942801	2.79589	10	1207	33
GO:0018101	protein citrullination	0.0407506	0.811585	0.978013	4.07897e-05	2.86987e-07	0.000127635	2.83432	5	1207	5
GO:0019064	fusion of virus membrane with host plasma membrane	0.033816	0.811585	0.811585	4.07897e-05	1.93257e-10	3.9096e-07	2.74117	10	1207	15
GO:0019065	receptor-mediated endocytosis of virus by host cell	0.0394044	0.811585	0.945707	4.07897e-05	9.73942e-08	8.44408e-05	2.81755	9	1207	19
GO:0030574	collagen catabolic process	0.0767693	0.811585	1	4.07897e-05	3.49066e-05	0.010088	3.15059	10	1207	43
GO:0033986	response to methanol	0.0435652	0.811585	1	4.07897e-05	5.84758e-06	0.00197161	2.86767	4	1207	4
GO:0036414	histone citrullination	0.0407506	0.811585	0.978013	4.07897e-05	2.86987e-07	0.000127635	2.83432	5	1207	5
GO:0039654	fusion of virus membrane with host endosome membrane	0.0378136	0.811585	0.907526	4.07897e-05	3.17542e-10	4.8179e-07	2.79697	9	1207	12
GO:0039663	membrane fusion involved in viral entry into host cell	0.033816	0.811585	0.811585	4.07897e-05	1.93257e-10	3.9096e-07	2.74117	10	1207	15
GO:0044764	multi-organism cellular process	0.0360188	0.811585	0.86445	4.07897e-05	2.07796e-07	0.000126111	2.77268	10	1207	26
GO:0044766	multi-organism transport	0.0361819	0.811585	0.868366	4.07897e-05	3.15461e-07	0.000127635	2.77494	10	1207	27
GO:0044800	multi-organism membrane fusion	0.033816	0.811585	0.811585	4.07897e-05	1.93257e-10	3.9096e-07	2.74117	10	1207	15
GO:0044803	multi-organism membrane organization	0.0344279	0.811585	0.82627	4.07897e-05	2.45804e-09	2.98357e-06	2.75013	10	1207	18
GO:0046687	response to chromate	0.0435652	0.811585	1	4.07897e-05	2.80899e-05	0.00852389	2.86767	4	1207	5
GO:0046718	viral entry into host cell	0.0396492	0.811585	0.951581	0.000489496	0.000384201	0.0971549	1.74144	14	1207	100
GO:0046794	transport of virus	0.0360596	0.811585	0.865429	4.07897e-05	1.33782e-07	0.000101491	2.77325	10	1207	25
GO:0070989	oxidative demethylation	0.0410361	0.811585	0.984866	4.07897e-05	2.05887e-05	0.00657647	2.83781	7	1207	19
GO:0075509	endocytosis involved in viral entry into host cell	0.0395268	0.811585	0.948644	4.07897e-05	1.69324e-07	0.000114181	2.81909	9	1207	20
GO:1902579	multi-organism localization	0.0361819	0.811585	0.868366	4.07897e-05	3.15461e-07	0.000127635	2.77494	10	1207	27

## Sheet: H3K27me3
H3K27me3
GOID: Gene Ontology Identifier. A unique identifier for each Gene Ontology term in the database.
TERM: The full name of the Gene Ontology term associated with the enrichment analysis.
P.value.cyclic: p-value from the cyclic permutation test. Indicates the probability of observing at least the same number of genes from this GO term within the analyzed loci by chance, using cyclic permutations that preserve genomic order.
P.adjust.cyclic.BH: Benjamini-Hochberg adjusted p-value from the cyclic permutation test.
P.adjust.cyclic.Bonfferroni: Bonferroni-adjusted p-value from the cyclic permutation test.
P.value.random: p-value from the random permutation test. Indicates the probability of observing at least the same number of genes from this GO term within the analyzed loci by chance, using random permutations that disrupt genomic order.
P.value.hyper: -value from the hypergeometric test. The conventional enrichment analysis method.
P.adjust.hyper.BH: Benjamini-Hochberg adjusted p-value from the hypergeometric test.
residuals: Distance between the cyclic permutation p-value and the linear regression line between cyclic and random permutation p-values.
b: The number of genes falling within the analyzed loci that belong to the specific GO term
B: The total number of genes across the entire genome belonging to the specific GO term.
n: The total number of genes found within the analyzed loci (regardless of GO term).
GOID	TERM	P.value.cyclic	P.adjust.cyclic.BH	P.adjust.cyclic.Bonfferroni	P.value.random	P.value.hyper	P.adjust.hyper.BH	residuals	b	B	n
GO:0001501	skeletal system development	0.0110952	0.464614	1	0.000693453	0.000948743	0.055824	0.968648	106	539	3608
GO:0001667	ameboidal-type cell migration	0.00203957	0.271262	0.485417	0.000571079	0.00078716	0.0483268	0.210558	90	443	3608
GO:0001708	cell fate specification	0.000326331	0.0639608	0.0776667	0.000652662	0.000521126	0.036257	-0.758878	28	101	3608
GO:0001759	organ induction	0.00138691	0.208036	0.330084	0.00195798	0.00182745	0.0855331	-0.516366	11	29	3608
GO:0002118	aggressive behavior	0.00110137	0.180624	0.262125	0.00138691	0.00124402	0.0656392	-0.481256	6	10	3608
GO:0002367	cytokine production involved in immune response	0.00191719	0.260738	0.456292	0.000163165	0.00023377	0.021883	0.723852	31	111	3608
GO:0002369	T cell cytokine production	0.00301856	0.33506	0.718417	0.00199878	0.00176586	0.0834087	-0.138526	15	46	3608
GO:0002931	response to ischemia	0.000203957	0.0411993	0.0485417	0.000203957	0.000238842	0.0219604	-0.487487	15	39	3608
GO:0003002	regionalization	0.00632266	0.455231	1	0.000326331	0.000424537	0.0331869	1.01631	80	378	3608
GO:0003013	circulatory system process	0.000734244	0.132164	0.17475	0.000203957	9.2033e-05	0.0105296	0.149592	113	547	3608
GO:0003073	regulation of systemic arterial blood pressure	0.000775036	0.138731	0.184458	4.07897e-05	8.02872e-07	0.000317968	0.875471	40	125	3608
GO:0003208	cardiac ventricle morphogenesis	0.00338568	0.341587	0.805792	0.00171324	0.00110818	0.0620159	-0.0144945	23	81	3608
GO:0003229	ventricular cardiac muscle tissue development	0.000163165	0.0342647	0.0388334	0.00089741	0.000762202	0.0472795	-1.24192	20	65	3608
GO:0006063	uronic acid metabolic process	0.121885	0.94587	1	0.000122374	6.19348e-05	0.00741562	2.91392	8	12	3608
GO:0006139	nucleobase-containing compound metabolic process	0.00901489	0.464614	1	0.000285539	0.000277522	0.0241968	1.25073	793	4861	3608
GO:0006171	cAMP biosynthetic process	0.00061187	0.111972	0.145625	4.07914e-05	2.37252e-05	0.00334656	0.757884	8	11	3608
GO:0006351	transcription, DNA-templated	0.00220273	0.284153	0.52425	4.07897e-05	1.11605e-05	0.00221	1.39498	548	3174	3608
GO:0006355	regulation of transcription, DNA-templated	0.00110137	0.180624	0.262125	4.07897e-05	5.49865e-06	0.00134809	1.05024	536	3079	3608
GO:0006357	regulation of transcription by RNA polymerase II	0.00310014	0.336529	0.737834	4.07897e-05	1.24402e-05	0.00232904	1.56495	426	2408	3608
GO:0006366	transcription by RNA polymerase II	0.00305935	0.336529	0.728126	4.07897e-05	1.5029e-05	0.00262295	1.55836	435	2469	3608
GO:0006725	cellular aromatic compound metabolic process	0.00693453	0.464614	1	0.000244748	0.00027203	0.0239409	1.18719	824	5063	3608
GO:0006807	nitrogen compound metabolic process	0.00668978	0.460494	1	4.07897e-05	1.56917e-05	0.00264881	1.94748	1361	8494	3608
GO:0006884	cell volume homeostasis	0.00167245	0.23916	0.398042	0.000652662	0.000657654	0.0423241	0.0538656	13	34	3608
GO:0006928	movement of cell or subcellular component	0.00934122	0.464614	1	0.00122374	0.00114843	0.0629569	0.63639	366	2153	3608
GO:0007166	cell surface receptor signaling pathway	0.0156639	0.464614	1	0.000530288	0.000503766	0.0355293	1.25666	422	2484	3608
GO:0007167	enzyme linked receptor protein signaling pathway	0.00118295	0.183357	0.281542	4.07914e-05	0.000182715	0.0179499	1.08576	180	952	3608
GO:0007275	multicellular organism development	8.15827e-05	0.0179482	0.0194167	4.07897e-05	7.68524e-08	5.35233e-05	-0.244222	891	5229	3608
GO:0007399	nervous system development	4.07914e-05	0.00970834	0.00970834	4.07897e-05	1.86697e-05	0.00284735	-0.588962	426	2418	3608
GO:0007528	neuromuscular junction development	0.00546604	0.420885	1	0.0018764	0.0021672	0.0949601	0.18423	17	56	3608
GO:0008015	blood circulation	0.000163165	0.0342647	0.0388334	4.07914e-05	2.94858e-05	0.00399494	0.100501	110	516	3608
GO:0008152	metabolic process	0.0135427	0.464614	1	4.07914e-05	1.2069e-05	0.00230138	2.29824	1626	10258	3608
GO:0008217	regulation of blood pressure	0.000448705	0.0861513	0.106792	4.07897e-05	2.42818e-06	0.000757665	0.603644	58	216	3608
GO:0008219	cell death	0.00383439	0.356598	0.912584	0.00101978	0.000760038	0.0472795	0.272713	344	2001	3608
GO:0008544	epidermis development	0.00371201	0.348929	0.883459	0.000285539	0.000412997	0.0329382	0.809423	69	316	3608
GO:0009058	biosynthetic process	0.000163165	0.0342647	0.0388334	4.07897e-05	8.62303e-07	0.000328857	0.100519	882	5241	3608
GO:0009059	macromolecule biosynthetic process	0.000530288	0.0996941	0.126208	4.07897e-05	1.05048e-06	0.000386315	0.686729	727	4249	3608
GO:0009190	cyclic nucleotide biosynthetic process	0.000775036	0.138731	0.184458	0.000163165	0.000267729	0.0239409	0.273393	11	24	3608
GO:0009653	anatomical structure morphogenesis	0.00167245	0.23916	0.398042	0.000244748	0.000161739	0.0167218	0.479834	478	2806	3608
GO:0009719	response to endogenous stimulus	0.0165205	0.464614	1	0.00146849	0.00173195	0.0831861	0.840784	258	1482	3608
GO:0009790	embryo development	0.00599633	0.449725	1	0.00138691	0.00125172	0.0656392	0.36156	227	1280	3608
GO:0009812	flavonoid metabolic process	0.119886	0.94587	1	4.07914e-05	7.43808e-06	0.00159562	3.38281	8	10	3608
GO:0009886	post-embryonic animal morphogenesis	0.00179482	0.251275	0.427167	0.000407914	0.000439694	0.0335372	0.293108	9	18	3608
GO:0009887	animal organ morphogenesis	0.00089741	0.151662	0.213584	8.15827e-05	0.000112446	0.0124501	0.647337	210	1124	3608
GO:0009888	tissue development	4.07914e-05	0.00970834	0.00970834	4.07897e-05	8.31673e-08	5.35233e-05	-0.588962	368	1947	3608
GO:0009889	regulation of biosynthetic process	0.00240669	0.303243	0.572792	4.07897e-05	3.05184e-05	0.00408115	1.43902	647	3836	3608
GO:0009891	positive regulation of biosynthetic process	4.07914e-05	0.00970834	0.00970834	4.07897e-05	4.32757e-09	5.57013e-06	-0.588962	373	1927	3608
GO:0009892	negative regulation of metabolic process	0.0148481	0.464614	1	0.00179482	0.0019065	0.0876396	0.700549	494	2992	3608
GO:0009893	positive regulation of metabolic process	0.000163165	0.0342647	0.0388334	4.07897e-05	5.41224e-06	0.00134809	0.100519	634	3701	3608
GO:0009914	hormone transport	0.00252906	0.303569	0.601917	0.000815827	0.000894886	0.0542038	0.162643	77	370	3608
GO:0009954	proximal/distal pattern formation	0.00648583	0.460494	1	0.000489496	0.000466263	0.0339683	0.852886	14	37	3608
GO:0009966	regulation of signal transduction	0.00212115	0.279992	0.504834	4.07897e-05	1.90801e-05	0.00284735	1.37621	489	2815	3608
GO:0009967	positive regulation of signal transduction	0.00391597	0.356598	0.932001	0.00110137	0.000788473	0.0483268	0.24976	268	1524	3608
GO:0009968	negative regulation of signal transduction	8.15827e-05	0.0179482	0.0194167	4.07897e-05	1.07664e-05	0.00217376	-0.244222	234	1226	3608
GO:0010035	response to inorganic substance	0.00134611	0.204609	0.320375	0.000367122	0.000159774	0.0167218	0.195785	106	514	3608
GO:0010038	response to metal ion	0.00693453	0.464614	1	0.00232511	0.001714	0.0828594	0.209463	61	287	3608
GO:0010467	gene expression	0.00346726	0.341587	0.825209	4.07897e-05	1.72902e-05	0.00278184	1.62061	921	5593	3608
GO:0010468	regulation of gene expression	0.00248827	0.303569	0.592209	4.07914e-05	3.23224e-05	0.00426697	1.45559	772	4645	3608
GO:0010556	regulation of macromolecule biosynthetic process	0.000856618	0.148195	0.203875	4.07897e-05	5.43921e-06	0.00134809	0.925248	615	3580	3608
GO:0010557	positive regulation of macromolecule biosynthetic process	4.07914e-05	0.00970834	0.00970834	4.07897e-05	4.59464e-11	1.18278e-07	-0.588962	357	1765	3608
GO:0010604	positive regulation of macromolecule metabolic process	0.000122374	0.0259433	0.029125	4.07897e-05	5.34763e-06	0.00134809	-0.0425615	583	3376	3608
GO:0010605	negative regulation of macromolecule metabolic process	0.0121966	0.464614	1	0.000775036	0.00108173	0.0612009	0.967414	464	2778	3608
GO:0010634	positive regulation of epithelial cell migration	0.00171324	0.241566	0.40775	0.00195798	0.00189308	0.0874128	-0.411271	37	156	3608
GO:0010646	regulation of cell communication	0.00163165	0.234958	0.388334	4.07897e-05	6.04415e-06	0.00141447	1.24572	582	3373	3608
GO:0010647	positive regulation of cell communication	0.00265144	0.310218	0.631042	0.000122374	0.000200596	0.0193704	1.01005	331	1883	3608
GO:0010648	negative regulation of cell communication	0.000163165	0.0342647	0.0388334	4.07897e-05	1.82686e-05	0.00284735	0.100519	254	1356	3608
GO:0010887	negative regulation of cholesterol storage	0.0940649	0.94587	1	0.000693453	0.000531465	0.0367281	2.03173	8	15	3608
GO:0010941	regulation of cell death	0.00297777	0.33351	0.708709	0.000775036	0.000613433	0.0402326	0.26615	297	1699	3608
GO:0012501	programmed cell death	0.00391597	0.356598	0.932001	0.00155007	0.001337	0.0683973	0.10134	312	1815	3608
GO:0016043	cellular component organization	0.00346726	0.341587	0.825209	4.07897e-05	2.92329e-05	0.00399494	1.62061	954	5828	3608
GO:0016070	RNA metabolic process	0.00465021	0.404569	1	0.000163165	0.000162556	0.0167218	1.16453	665	4008	3608
GO:0016477	cell migration	0.0110137	0.464614	1	0.00228432	0.00205612	0.0928592	0.447238	266	1537	3608
GO:0016485	protein processing	0.0250459	0.501122	1	0.000203957	0.00013977	0.0151496	1.90507	59	251	3608
GO:0018130	heterocycle biosynthetic process	0.000978992	0.164471	0.233	4.07897e-05	6.24292e-06	0.00142852	0.99166	618	3603	3608
GO:0018149	peptide cross-linking	0.0070977	0.464614	1	4.07897e-05	5.16304e-07	0.000231147	1.97692	19	39	3608
GO:0019219	regulation of nucleobase-containing compound metabolic process	0.0099123	0.464614	1	0.000693453	0.000567341	0.0380169	0.912576	599	3626	3608
GO:0019222	regulation of metabolic process	0.00868856	0.464614	1	0.000122374	0.000151302	0.0160614	1.60037	1035	6426	3608
GO:0019438	aromatic compound biosynthetic process	0.00114216	0.180624	0.271834	4.07897e-05	5.79091e-06	0.00138672	1.06833	621	3620	3608
GO:0019538	protein metabolic process	0.0120334	0.464614	1	0.000122374	0.000164019	0.0167218	1.76235	773	4710	3608
GO:0019585	glucuronate metabolic process	0.121885	0.94587	1	0.000122374	6.19348e-05	0.00741562	2.91392	8	12	3608
GO:0019725	cellular homeostasis	0.00199878	0.269835	0.475709	0.000693453	0.000732162	0.046252	0.116189	174	942	3608
GO:0021510	spinal cord development	0.0033041	0.341587	0.786376	0.000978992	0.00139229	0.0699338	0.216412	27	102	3608
GO:0021517	ventral spinal cord development	0.0102794	0.464614	1	0.00179482	0.0021672	0.0949601	0.517659	17	56	3608
GO:0022008	neurogenesis	4.07914e-05	0.00970834	0.00970834	0.000122374	8.15304e-05	0.00943279	-1.0661	332	1867	3608
GO:0023051	regulation of signaling	0.00322252	0.341587	0.766959	4.07914e-05	1.69791e-05	0.00277882	1.58419	579	3383	3608
GO:0023056	positive regulation of signaling	0.00354885	0.341587	0.844626	0.000285539	0.000321857	0.0267271	0.787066	330	1889	3608
GO:0023057	negative regulation of signaling	0.000244748	0.0489496	0.0582501	4.07897e-05	2.03161e-05	0.00294641	0.302179	254	1358	3608
GO:0030154	cell differentiation	4.07914e-05	0.00970834	0.00970834	4.07897e-05	8.19199e-08	5.35233e-05	-0.588962	713	4092	3608
GO:0030182	neuron differentiation	0.00318173	0.340445	0.757251	0.000448705	0.000581567	0.0386348	0.536461	275	1560	3608
GO:0030216	keratinocyte differentiation	0.0358148	0.540404	1	0.00252906	0.00212535	0.0939261	0.989528	29	115	3608
GO:0030279	negative regulation of ossification	0.00134611	0.204609	0.320375	0.00171324	0.00137465	0.0693862	-0.473222	15	45	3608
GO:0030335	positive regulation of cell migration	0.00322252	0.341587	0.766959	0.000938201	0.0012558	0.0656392	0.222461	110	567	3608
GO:0030855	epithelial cell differentiation	0.00101978	0.169284	0.242709	4.07914e-05	5.19481e-05	0.0064447	1.01195	131	643	3608
GO:0031128	developmental induction	0.000448705	0.0861513	0.106792	0.00126453	0.00105877	0.060233	-0.887735	15	44	3608
GO:0031323	regulation of cellular metabolic process	0.00701611	0.464614	1	0.000203957	0.000109351	0.012239	1.27218	908	5577	3608
GO:0031324	negative regulation of cellular metabolic process	0.00599633	0.449725	1	0.000367122	0.000426014	0.0331869	0.938797	417	2447	3608
GO:0031325	positive regulation of cellular metabolic process	0.000367122	0.0715888	0.0873751	4.07897e-05	3.11845e-06	0.000944431	0.503839	551	3159	3608
GO:0031326	regulation of cellular biosynthetic process	0.00199878	0.269835	0.475709	4.07897e-05	1.89172e-05	0.00284735	1.34666	637	3757	3608
GO:0031328	positive regulation of cellular biosynthetic process	4.07914e-05	0.00970834	0.00970834	4.07897e-05	2.27494e-09	3.34644e-06	-0.588962	367	1881	3608
GO:0032026	response to magnesium ion	0.00122374	0.187232	0.29125	0.00122374	0.00112407	0.0622289	-0.374497	7	13	3608
GO:0032147	activation of protein kinase activity	0.000571079	0.106792	0.135917	0.000693453	0.000507888	0.0355763	-0.506879	27	96	3608
GO:0032268	regulation of cellular protein metabolic process	0.019743	0.464614	1	0.00110137	0.000600129	0.0396124	1.05435	388	2273	3608
GO:0032269	negative regulation of cellular protein metabolic process	0.0167652	0.464614	1	0.000693453	0.0006567	0.0423241	1.17395	176	952	3608
GO:0032502	developmental process	4.07914e-05	0.00970834	0.00970834	4.07897e-05	5.42177e-09	6.20311e-06	-0.588962	1055	6216	3608
GO:0032774	RNA biosynthetic process	0.00277381	0.321762	0.660167	4.07897e-05	1.4189e-05	0.00256323	1.50963	549	3187	3608
GO:0032782	bile acid secretion	0.0859882	0.94587	1	0.000244748	0.000284762	0.0241968	2.43938	8	14	3608
GO:0034641	cellular nitrogen compound metabolic process	0.00995309	0.464614	1	0.000326331	0.000415846	0.0329382	1.24198	899	5573	3608
GO:0034645	cellular macromolecule biosynthetic process	0.000571079	0.106792	0.135917	4.07897e-05	1.61787e-06	0.000555307	0.723587	719	4210	3608
GO:0034654	nucleobase-containing compound biosynthetic process	0.00106058	0.174995	0.252417	4.07897e-05	4.51839e-06	0.00125746	1.03147	610	3543	3608
GO:0035239	tube morphogenesis	0.00110137	0.180624	0.262125	0.00126453	0.00125242	0.0656392	-0.441139	165	898	3608
GO:0035295	tube development	0.000815827	0.14277	0.194167	0.000775036	0.000675611	0.042943	-0.37779	206	1136	3608
GO:0036065	fucosylation	0.0139506	0.464614	1	0.00167245	0.00196338	0.0894555	0.700212	7	14	3608
GO:0036314	response to sterol	0.0337752	0.540404	1	0.000938201	0.000927245	0.0551899	1.39103	12	31	3608
GO:0040011	locomotion	0.0112584	0.464614	1	0.00183561	0.00188838	0.0874128	0.553145	323	1895	3608
GO:0042592	homeostatic process	0.00477259	0.40567	1	0.000448705	0.000431878	0.0331869	0.738121	344	1985	3608
GO:0042940	D-amino acid transport	0.000367122	0.0715888	0.0873751	0.000815827	0.000568574	0.0380169	-0.797208	6	9	3608
GO:0042981	regulation of apoptotic process	0.00432388	0.384826	1	0.00216194	0.00176051	0.0834087	0.00613133	260	1495	3608
GO:0043066	negative regulation of apoptotic process	0.00762798	0.464614	1	0.00240669	0.00210273	0.0933267	0.241889	173	958	3608
GO:0043067	regulation of programmed cell death	0.0033041	0.341587	0.786376	0.00130532	0.00103399	0.0598146	0.0914736	268	1531	3608
GO:0043069	negative regulation of programmed cell death	0.00469101	0.404569	1	0.00130532	0.00105648	0.060233	0.265788	179	980	3608
GO:0043170	macromolecule metabolic process	0.00795431	0.464614	1	4.07897e-05	2.83304e-05	0.00394214	2.03359	1356	8485	3608
GO:0043523	regulation of neuron apoptotic process	0.000652662	0.118132	0.155333	0.000978992	0.000962569	0.0563158	-0.590229	60	275	3608
GO:0043524	negative regulation of neuron apoptotic process	0.000244748	0.0489496	0.0582501	0.000163165	0.000286687	0.0241968	-0.299899	45	183	3608
GO:0043588	skin development	0.0166837	0.464614	1	0.00146849	0.00208942	0.0932672	0.845672	59	278	3608
GO:0044057	regulation of system process	0.00110137	0.180624	0.262125	0.000693453	0.000467975	0.0339683	-0.180226	125	640	3608
GO:0044092	negative regulation of molecular function	0.0116255	0.464614	1	0.00101978	0.000942776	0.0557918	0.824377	173	941	3608
GO:0044237	cellular metabolic process	0.0285947	0.501122	1	0.000652662	0.000431063	0.0331869	1.46583	1456	9279	3608
GO:0044238	primary metabolic process	0.00938201	0.464614	1	4.07897e-05	1.17323e-05	0.0022794	2.1157	1435	8976	3608
GO:0044249	cellular biosynthetic process	0.000285539	0.0562513	0.0679584	4.07897e-05	4.37522e-07	0.00020478	0.378847	863	5098	3608
GO:0044260	cellular macromolecule metabolic process	0.011136	0.464614	1	0.000163165	0.000165658	0.0167233	1.59886	1131	7065	3608
GO:0044271	cellular nitrogen compound biosynthetic process	0.00183561	0.253314	0.436875	4.07897e-05	1.56115e-05	0.00264881	1.3043	705	4188	3608
GO:0044344	cellular response to fibroblast growth factor stimulus	0.00383439	0.356598	0.912584	0.0014277	0.00162721	0.0794096	0.126585	25	93	3608
GO:0045104	intermediate filament cytoskeleton organization	0.0183153	0.464614	1	0.00175403	0.00198443	0.0900162	0.814913	16	51	3608
GO:0045165	cell fate commitment	0.000489496	0.0925148	0.1165	0.00061187	0.000563375	0.0380169	-0.529189	63	286	3608
GO:0045595	regulation of cell differentiation	4.07914e-05	0.00970834	0.00970834	4.07897e-05	3.46073e-06	0.00101815	-0.588962	308	1652	3608
GO:0045596	negative regulation of cell differentiation	0.000122374	0.0259433	0.029125	0.000122374	0.000143061	0.0153447	-0.5197	140	710	3608
GO:0045664	regulation of neuron differentiation	0.00248827	0.303569	0.592209	0.00134611	0.00152687	0.0755876	-0.0629281	53	241	3608
GO:0045766	positive regulation of angiogenesis	0.00110137	0.180624	0.262125	0.00114216	0.00122854	0.0656392	-0.396935	42	179	3608
GO:0045893	positive regulation of transcription, DNA-templated	8.15827e-05	0.0179482	0.0194167	4.07897e-05	2.74922e-11	1.10599e-07	-0.244222	318	1532	3608
GO:0045935	positive regulation of nucleobase-containing compound metabolic process	8.15827e-05	0.0179482	0.0194167	4.07897e-05	1.13381e-08	1.16748e-05	-0.244222	355	1835	3608
GO:0045944	positive regulation of transcription by RNA polymerase II	4.07914e-05	0.00970834	0.00970834	4.07897e-05	2.68121e-10	5.52168e-07	-0.588962	263	1245	3608
GO:0046058	cAMP metabolic process	0.000775036	0.138731	0.184458	0.000326331	0.000284762	0.0241968	-0.027637	8	14	3608
GO:0046459	short-chain fatty acid metabolic process	0.00734244	0.464614	1	0.00195798	0.00196338	0.0894555	0.312525	7	14	3608
GO:0046483	heterocycle metabolic process	0.00783194	0.464614	1	0.000326331	0.000305126	0.0255437	1.12277	810	4976	3608
GO:0046717	acid secretion	0.0104426	0.464614	1	0.000693453	0.000546334	0.037504	0.938496	19	59	3608
GO:0046879	hormone secretion	0.00212115	0.279992	0.504834	0.000530288	0.000501091	0.0355293	0.26225	77	363	3608
GO:0046883	regulation of hormone secretion	0.00285539	0.32837	0.679584	0.000652662	0.000673535	0.042943	0.319913	65	299	3608
GO:0046916	cellular transition metal ion homeostasis	0.000448705	0.0861513	0.106792	0.000203957	0.000226854	0.0214304	-0.0953436	30	106	3608
GO:0048468	cell development	0.00150928	0.218846	0.359209	0.000203957	0.000204953	0.0195408	0.50796	407	2362	3608
GO:0048513	animal organ development	0.000978992	0.164471	0.233	4.07897e-05	2.02472e-06	0.000651517	0.99166	618	3572	3608
GO:0048518	positive regulation of biological process	0.000163165	0.0342647	0.0388334	4.07897e-05	2.01067e-07	0.000107189	0.100519	1052	6301	3608
GO:0048519	negative regulation of biological process	0.00212115	0.279992	0.504834	4.07914e-05	5.47208e-06	0.00134809	1.37619	901	5423	3608
GO:0048522	positive regulation of cellular process	4.07914e-05	0.00970834	0.00970834	4.07897e-05	2.13891e-08	2.00222e-05	-0.588962	980	5768	3608
GO:0048523	negative regulation of cellular process	0.00183561	0.253314	0.436875	4.07897e-05	1.50898e-06	0.000535792	1.3043	826	4896	3608
GO:0048546	digestive tract morphogenesis	0.000815827	0.14277	0.194167	0.00232511	0.00174499	0.0831861	-0.854911	17	55	3608
GO:0048563	post-embryonic animal organ morphogenesis	0.00146849	0.215868	0.3495	0.000203957	0.000283744	0.0241968	0.494333	7	11	3608
GO:0048583	regulation of response to stimulus	0.00860698	0.464614	1	0.000122374	0.000240995	0.0219604	1.59567	616	3705	3608
GO:0048585	negative regulation of response to stimulus	0.00322252	0.341587	0.766959	0.000163165	0.000183038	0.0179499	0.982129	289	1619	3608
GO:0048646	anatomical structure formation involved in morphogenesis	0.00146849	0.215868	0.3495	0.000489496	0.000448421	0.0338878	0.114122	212	1164	3608
GO:0048663	neuron fate commitment	0.000203957	0.0411993	0.0485417	4.07914e-05	4.12837e-05	0.00538099	0.211483	25	75	3608
GO:0048665	neuron fate specification	0.000244748	0.0489496	0.0582501	0.000203957	7.41969e-05	0.00868188	-0.396809	14	32	3608
GO:0048699	generation of neurons	4.07914e-05	0.00970834	0.00970834	8.15827e-05	5.51069e-05	0.00675519	-0.89001	313	1740	3608
GO:0048706	embryonic skeletal system development	0.0247196	0.501122	1	0.00101978	0.0010429	0.0599927	1.19958	36	146	3608
GO:0048729	tissue morphogenesis	0.00061187	0.111972	0.145625	0.000448705	0.000484907	0.0349167	-0.283509	132	682	3608
GO:0048731	system development	4.07914e-05	0.00970834	0.00970834	4.07897e-05	5.13748e-08	4.06928e-05	-0.588962	832	4839	3608
GO:0048856	anatomical structure development	4.07914e-05	0.00970834	0.00970834	4.07897e-05	1.36483e-07	8.26685e-05	-0.588962	972	5769	3608
GO:0048869	cellular developmental process	4.07914e-05	0.00970834	0.00970834	4.07897e-05	4.15342e-08	3.56398e-05	-0.588962	733	4202	3608
GO:0048870	cell motility	0.00983072	0.464614	1	0.00134611	0.00127828	0.0661429	0.6204	297	1719	3608
GO:0050793	regulation of developmental process	4.07914e-05	0.00970834	0.00970834	4.07897e-05	6.75488e-07	0.000289813	-0.588962	467	2596	3608
GO:0050885	neuromuscular process controlling balance	0.00138691	0.208036	0.330084	0.00195798	0.00209233	0.0932672	-0.516366	20	70	3608
GO:0050905	neuromuscular process	0.000856618	0.148195	0.203875	0.000489496	0.000500311	0.0355293	-0.153951	47	198	3608
GO:0051093	negative regulation of developmental process	0.00261065	0.308056	0.621334	0.000815827	0.0010016	0.0582684	0.178433	180	985	3608
GO:0051094	positive regulation of developmental process	0.00550683	0.420885	1	0.000775036	0.000558876	0.0380169	0.571932	262	1478	3608
GO:0051171	regulation of nitrogen compound metabolic process	0.0084846	0.464614	1	0.000203957	0.000239246	0.0219604	1.3667	848	5215	3608
GO:0051172	negative regulation of nitrogen compound metabolic process	0.00481338	0.40567	1	0.000244748	0.00027081	0.0239409	1.0056	395	2294	3608
GO:0051173	positive regulation of nitrogen compound metabolic process	4.07914e-05	0.00970834	0.00970834	4.07897e-05	7.29031e-07	0.000300273	-0.588962	519	2922	3608
GO:0051179	localization	0.00522129	0.407261	1	4.07897e-05	4.96902e-05	0.00631679	1.82422	945	5789	3608
GO:0051239	regulation of multicellular organismal process	0.000163165	0.0342647	0.0388334	4.07897e-05	1.96423e-05	0.00288938	0.100519	499	2879	3608
GO:0051240	positive regulation of multicellular organismal process	0.00114216	0.180624	0.271834	8.15827e-05	0.000108315	0.012239	0.76728	295	1644	3608
GO:0051246	regulation of protein metabolic process	0.0246788	0.501122	1	0.00150928	0.00125231	0.0656392	1.02849	411	2443	3608
GO:0051248	negative regulation of protein metabolic process	0.0238629	0.501122	1	0.00122374	0.00148523	0.0742397	1.10286	184	1018	3608
GO:0051252	regulation of RNA metabolic process	0.00738323	0.464614	1	0.000367122	0.000170743	0.0170693	1.04228	566	3371	3608
GO:0051254	positive regulation of RNA metabolic process	8.15827e-05	0.0179482	0.0194167	4.07897e-05	5.53863e-10	9.50521e-07	-0.244222	334	1665	3608
GO:0051604	protein maturation	0.0420151	0.540404	1	0.00106058	0.000867901	0.0528803	1.44636	67	313	3608
GO:0051674	localization of cell	0.00983072	0.464614	1	0.00134611	0.00127828	0.0661429	0.6204	297	1719	3608
GO:0051938	L-glutamate import	0.000407914	0.0787273	0.0970834	0.000530288	0.000926066	0.0551899	-0.55772	8	16	3608
GO:0052652	cyclic purine nucleotide metabolic process	0.000775036	0.138731	0.184458	0.000163165	0.000267729	0.0239409	0.273393	11	24	3608
GO:0052695	cellular glucuronidation	0.120171	0.94587	1	8.15827e-05	2.37252e-05	0.00334656	3.08297	8	11	3608
GO:0052696	flavonoid glucuronidation	0.117683	0.94587	1	4.07897e-05	2.18604e-07	0.000107189	3.37361	8	8	3608
GO:0052697	xenobiotic glucuronidation	0.117683	0.94587	1	4.07897e-05	2.18604e-07	0.000107189	3.37361	8	8	3608
GO:0055010	ventricular cardiac muscle tissue morphogenesis	0.00179482	0.251275	0.427167	0.00195798	0.00174499	0.0831861	-0.388134	17	55	3608
GO:0055067	monovalent inorganic cation homeostasis	0.00513971	0.406037	1	0.00216194	0.00229873	0.099454	0.0920957	38	163	3608
GO:0055076	transition metal ion homeostasis	0.000856618	0.148195	0.203875	0.000407914	0.000461594	0.0339683	-0.07477	34	130	3608
GO:0060041	retina development in camera-type eye	0.00697532	0.464614	1	0.00228432	0.00225163	0.0978272	0.220067	41	179	3608
GO:0060255	regulation of macromolecule metabolic process	0.00497654	0.40567	1	4.07914e-05	4.64546e-05	0.00597929	1.80033	971	5957	3608
GO:0060340	positive regulation of type I interferon-mediated signaling pathway	0.00358964	0.341587	0.854334	0.00101978	0.00112407	0.0622289	0.239908	7	13	3608
GO:0060429	epithelium development	0.000163165	0.0342647	0.0388334	4.07914e-05	1.70016e-05	0.00277882	0.100501	229	1204	3608
GO:0060548	negative regulation of cell death	0.00256986	0.305813	0.611626	0.000489496	0.000389947	0.0313694	0.39245	203	1106	3608
GO:0061217	regulation of mesonephros development	0.0129717	0.464614	1	0.00191719	0.00206669	0.0929288	0.60471	4	5	3608
GO:0065008	regulation of biological quality	0.00868856	0.464614	1	4.07914e-05	7.15539e-05	0.00846885	2.07749	681	4083	3608
GO:0065009	regulation of molecular function	0.00615949	0.449725	1	0.00061187	0.000354251	0.0291818	0.730301	413	2416	3608
GO:0070723	response to cholesterol	0.0399347	0.540404	1	0.000367122	0.000623813	0.0406545	1.88183	11	26	3608
GO:0070777	D-aspartate transport	0.000571079	0.106792	0.135917	0.000448705	0.000362625	0.0294012	-0.317823	5	6	3608
GO:0070779	D-aspartate import across plasma membrane	0.000571079	0.106792	0.135917	0.000448705	0.000362625	0.0294012	-0.317823	5	6	3608
GO:0070857	regulation of bile acid biosynthetic process	0.112013	0.94587	1	0.000856618	0.000926066	0.0551899	2.02681	8	16	3608
GO:0071363	cellular response to growth factor stimulus	0.00338568	0.341587	0.805792	0.00179482	0.00163922	0.0796181	-0.0346979	121	637	3608
GO:0071495	cellular response to endogenous stimulus	0.0103202	0.464614	1	0.00110137	0.00135845	0.068906	0.731718	227	1282	3608
GO:0071692	protein localization to extracellular region	0.00232511	0.297614	0.553375	0.00212115	0.0018795	0.0874128	-0.294149	80	397	3608
GO:0071704	organic substance metabolic process	0.00652662	0.460494	1	4.07897e-05	1.77186e-06	0.000588543	1.9352	1582	9886	3608
GO:0071774	response to fibroblast growth factor	0.00493575	0.40567	1	0.00191719	0.00223865	0.0976751	0.124135	25	95	3608
GO:0071840	cellular component organization or biogenesis	0.00293698	0.331878	0.699001	4.07897e-05	1.84793e-05	0.00284735	1.53806	981	5988	3608
GO:0072073	kidney epithelium development	0.00489496	0.40567	1	0.0014277	0.00153495	0.0756238	0.248037	36	149	3608
GO:0072106	regulation of ureteric bud formation	0.0070569	0.464614	1	0.000203957	0.000468437	0.0339683	1.27507	4	4	3608
GO:0072107	positive regulation of ureteric bud formation	0.0070569	0.464614	1	0.000203957	0.000468437	0.0339683	1.27507	4	4	3608
GO:0072520	seminiferous tubule development	0.00799511	0.464614	1	0.00101978	0.00114945	0.0629569	0.63818	9	20	3608
GO:0080090	regulation of primary metabolic process	0.00432388	0.384826	1	8.15827e-05	5.14232e-05	0.0064447	1.42938	886	5404	3608
GO:0090205	positive regulation of cholesterol metabolic process	0.0974505	0.94587	1	0.00167245	0.0015245	0.0755876	1.66698	8	17	3608
GO:0090269	fibroblast growth factor production	0.00240669	0.303243	0.572792	0.00118295	0.00124402	0.0656392	-0.0233922	6	10	3608
GO:0090270	regulation of fibroblast growth factor production	0.00240669	0.303243	0.572792	0.00118295	0.00124402	0.0656392	-0.0233922	6	10	3608
GO:0090304	nucleic acid metabolic process	0.0180706	0.464614	1	0.00118295	0.00134178	0.0683973	0.979293	722	4462	3608
GO:0097659	nucleic acid-templated transcription	0.00240669	0.303243	0.572792	4.07897e-05	1.28996e-05	0.00237192	1.43902	548	3178	3608
GO:0110110	positive regulation of animal organ morphogenesis	4.07914e-05	0.00970834	0.00970834	0.000571079	0.000450872	0.0338878	-1.73511	15	41	3608
GO:0120188	regulation of bile acid secretion	0.124903	0.94587	1	4.07897e-05	1.03726e-05	0.00213614	3.40322	7	8	3608
GO:1901135	carbohydrate derivative metabolic process	0.00481338	0.40567	1	0.00122374	0.00108899	0.0612748	0.306625	163	883	3608
GO:1901214	regulation of neuron death	0.00285539	0.32837	0.679584	0.0018764	0.00157246	0.0771031	-0.138725	78	383	3608
GO:1901215	negative regulation of neuron death	0.00322252	0.341587	0.766959	0.00175403	0.00182197	0.0855331	-0.0492794	55	254	3608
GO:1901360	organic cyclic compound metabolic process	0.00701611	0.464614	1	0.000244748	0.000201286	0.0193704	1.193	857	5267	3608
GO:1901362	organic cyclic compound biosynthetic process	0.000856618	0.148195	0.203875	4.07897e-05	3.84633e-06	0.00110016	0.925248	641	3736	3608
GO:1901564	organonitrogen compound metabolic process	0.00305935	0.336529	0.728126	4.07914e-05	1.46924e-05	0.0026084	1.55835	913	5535	3608
GO:1901566	organonitrogen compound biosynthetic process	0.00232511	0.297614	0.553375	0.00138691	0.00132045	0.0679834	-0.109625	243	1381	3608
GO:1901576	organic substance biosynthetic process	8.15827e-05	0.0179482	0.0194167	4.07897e-05	2.01441e-07	0.000107189	-0.244222	875	5153	3608
GO:1902680	positive regulation of RNA biosynthetic process	8.15827e-05	0.0179482	0.0194167	4.07897e-05	3.22226e-11	1.10599e-07	-0.244222	318	1534	3608
GO:1903506	regulation of nucleic acid-templated transcription	0.00118295	0.183357	0.281542	4.07897e-05	6.40089e-06	0.00143283	1.08578	536	3083	3608
GO:1903508	positive regulation of nucleic acid-templated transcription	8.15827e-05	0.0179482	0.0194167	4.07897e-05	2.74922e-11	1.10599e-07	-0.244222	318	1532	3608
GO:1904018	positive regulation of vasculature development	0.00110137	0.180624	0.262125	0.00114216	0.00122854	0.0656392	-0.396935	42	179	3608
GO:1904251	regulation of bile acid metabolic process	0.0373241	0.540404	1	4.07914e-05	0.000120867	0.0132401	2.80245	10	19	3608
GO:2000026	regulation of multicellular organismal development	0.00664899	0.460494	1	0.00061187	0.000741664	0.0465665	0.768334	262	1485	3608
GO:2000112	regulation of cellular macromolecule biosynthetic process	0.00110137	0.180624	0.262125	4.07897e-05	7.12438e-06	0.00156085	1.05024	608	3543	3608
GO:2001141	regulation of RNA biosynthetic process	0.00138691	0.208036	0.330084	4.07897e-05	7.72685e-06	0.00162374	1.16489	536	3088	3608

## Sheet: patient_SP102622_deletions
patient_SP102622_deletions
GOID: Gene Ontology Identifier. A unique identifier for each Gene Ontology term in the database.
TERM: The full name of the Gene Ontology term associated with the enrichment analysis.
P.value.cyclic: p-value from the cyclic permutation test. Indicates the probability of observing at least the same number of genes from this GO term within the analyzed loci by chance, using cyclic permutations that preserve genomic order.
P.adjust.cyclic.BH: Benjamini-Hochberg adjusted p-value from the cyclic permutation test.
P.adjust.cyclic.Bonfferroni: Bonferroni-adjusted p-value from the cyclic permutation test.
P.value.random: p-value from the random permutation test. Indicates the probability of observing at least the same number of genes from this GO term within the analyzed loci by chance, using random permutations that disrupt genomic order.
P.value.hyper: -value from the hypergeometric test. The conventional enrichment analysis method.
P.adjust.hyper.BH: Benjamini-Hochberg adjusted p-value from the hypergeometric test.
residuals: Distance between the cyclic permutation p-value and the linear regression line between cyclic and random permutation p-values.
b: The number of genes falling within the analyzed loci that belong to the specific GO term
B: The total number of genes across the entire genome belonging to the specific GO term.
n: The total number of genes found within the analyzed loci (regardless of GO term).
GOID	TERM	P.value.cyclic	P.adjust.cyclic.BH	P.adjust.cyclic.Bonfferroni	P.value.random	P.value.hyper	P.adjust.hyper.BH	residuals	b	B	n
GO:0002286	T cell activation involved in immune response	0.0685615	0.411369	1	4.33915e-05	3.15909e-05	0.0193626	3.10158	22	88	2268
GO:0002323	natural killer cell activation involved in immune response	0.0819267	0.411369	1	4.33915e-05	2.50904e-11	3.07567e-08	3.18741	16	24	2268
GO:0007214	gamma-aminobutyric acid signaling pathway	0.00763723	0.106921	0.114558	4.33915e-05	5.21548e-05	0.0295076	2.04383	9	20	2268
GO:0007259	receptor signaling pathway via JAK-STAT	0.0351052	0.351052	0.526578	0.000173573	0.000111824	0.0587475	2.17688	29	142	2268
GO:0015012	heparan sulfate proteoglycan biosynthetic process	0.00026036	0.0039054	0.0039054	4.33915e-05	0.000128689	0.0631006	0.415429	9	22	2268
GO:0030101	natural killer cell activation	0.0748535	0.411369	1	4.33915e-05	3.5028e-06	0.00286256	3.14389	19	61	2268
GO:0033139	regulation of peptidyl-serine phosphorylation of STAT protein	0.0806249	0.411369	1	4.33915e-05	2.43023e-13	8.93716e-10	3.17969	16	20	2268
GO:0033141	positive regulation of peptidyl-serine phosphorylation of STAT protein	0.0805815	0.411369	1	4.33915e-05	5.35261e-14	3.93684e-10	3.17943	16	19	2268
GO:0042100	B cell proliferation	0.0500759	0.35422	0.751139	4.33915e-05	1.89075e-06	0.0017383	2.95015	22	75	2268
GO:0042501	serine phosphorylation of STAT protein	0.0807117	0.411369	1	4.33915e-05	9.26876e-13	1.70429e-09	3.18021	16	21	2268
GO:0043330	response to exogenous dsRNA	0.0393578	0.35422	0.590367	4.33915e-05	5.0681e-12	7.45518e-09	2.83407	20	35	2268
GO:0043331	response to dsRNA	0.00867867	0.112823	0.13018	4.33915e-05	6.20248e-13	1.52064e-09	2.10544	22	39	2268
GO:0046425	regulation of receptor signaling pathway via JAK-STAT	0.0437839	0.35422	0.656759	4.33915e-05	7.81282e-06	0.00574633	2.88544	23	87	2268
GO:0097696	receptor signaling pathway via STAT	0.0187893	0.225472	0.28184	4.33915e-05	2.71291e-05	0.0181395	2.47771	32	152	2268
GO:1904892	regulation of receptor signaling pathway via STAT	0.0202213	0.225472	0.30332	4.33915e-05	1.54318e-06	0.00162144	2.51311	26	97	2268

## Sheet: patient_SP102622_duplications
patient_SP102622_duplications
GOID: Gene Ontology Identifier. A unique identifier for each Gene Ontology term in the database.
TERM: The full name of the Gene Ontology term associated with the enrichment analysis.
P.value.cyclic: p-value from the cyclic permutation test. Indicates the probability of observing at least the same number of genes from this GO term within the analyzed loci by chance, using cyclic permutations that preserve genomic order.
P.adjust.cyclic.BH: Benjamini-Hochberg adjusted p-value from the cyclic permutation test.
P.adjust.cyclic.Bonfferroni: Bonferroni-adjusted p-value from the cyclic permutation test.
P.value.random: p-value from the random permutation test. Indicates the probability of observing at least the same number of genes from this GO term within the analyzed loci by chance, using random permutations that disrupt genomic order.
P.value.hyper: -value from the hypergeometric test. The conventional enrichment analysis method.
P.adjust.hyper.BH: Benjamini-Hochberg adjusted p-value from the hypergeometric test.
residuals: Distance between the cyclic permutation p-value and the linear regression line between cyclic and random permutation p-values.
b: The number of genes falling within the analyzed loci that belong to the specific GO term
B: The total number of genes across the entire genome belonging to the specific GO term.
n: The total number of genes found within the analyzed loci (regardless of GO term).
GOID	TERM	P.value.cyclic	P.adjust.cyclic.BH	P.adjust.cyclic.Bonfferroni	P.value.hyper	P.adjust.hyper.BH	P.value.random	residuals	b	B	n
GO:0000902	cell morphogenesis	0.0039054	0.112476	0.277284	0.00219781	0.0409341	0.00186591	-0.0213715	10	700	112
GO:0000904	cell morphogenesis involved in differentiation	0.00312432	0.112476	0.221827	0.00231188	0.0423034	0.00256021	-0.272013	8	477	112
GO:0001755	neural crest cell migration	0.00169234	0.0981558	0.120156	3.08458e-05	0.00292474	4.33915e-05	1.18767	4	37	112
GO:0003008	system process	0.00637882	0.112476	0.452897	0.000586559	0.0197349	0.000433934	0.861117	16	1309	112
GO:0006787	porphyrin-containing compound catabolic process	0.00533738	0.112476	0.378954	0.00149656	0.0318553	0.00169234	0.179581	2	12	112
GO:0007186	G protein-coupled receptor signaling pathway	0.00234324	0.101193	0.16637	1.34698e-06	0.00021171	4.33915e-05	1.35284	15	693	112
GO:0007399	nervous system development	0.00490345	0.112476	0.348145	0.00195841	0.0392812	0.00216967	0.0286362	17	1610	112
GO:0007409	axonogenesis	8.67867e-05	0.00598828	0.00616186	7.03338e-05	0.00523987	0.000173573	-0.922067	8	281	112
GO:0007411	axon guidance	0.00243003	0.101193	0.172532	0.00102791	0.0282135	0.00108483	-0.0266582	5	157	112
GO:0007416	synapse assembly	0.00229985	0.101193	0.163289	2.68162e-05	0.00279692	8.67867e-05	1.04231	6	120	112
GO:0007600	sensory perception	0.00138859	0.0888696	0.0985897	5.84366e-10	2.03165e-07	4.33915e-05	1.08726	15	384	112
GO:0007606	sensory perception of chemical stimulus	0.00173573	0.0981558	0.123237	8.49117e-13	4.42814e-10	4.33915e-05	1.20052	13	158	112
GO:0007608	sensory perception of smell	0.00138859	0.0888696	0.0985897	2.68797e-15	2.80355e-12	4.33915e-05	1.08726	13	102	112
GO:0014031	mesenchymal cell development	0.00182252	0.0981558	0.129399	0.000171201	0.00878673	0.00013018	0.748145	4	57	112
GO:0014032	neural crest cell development	0.00177913	0.0981558	0.126318	0.000119545	0.00766095	8.67867e-05	0.912005	4	52	112
GO:0014033	neural crest cell differentiation	0.00186591	0.0981558	0.13248	0.000183198	0.00878673	0.000216967	0.538239	4	58	112
GO:0015711	organic anion transport	0.00642222	0.112476	0.455977	0.00143759	0.0318553	0.00173573	0.262498	6	251	112
GO:0015718	monocarboxylic acid transport	0.00173573	0.0981558	0.123237	4.73139e-05	0.00379603	4.33915e-05	1.20052	5	81	112
GO:0015721	bile acid and bile salt transport	0.00138859	0.0888696	0.0985897	1.21809e-07	2.54094e-05	4.33915e-05	1.08726	5	25	112
GO:0015849	organic acid transport	0.00399219	0.112476	0.283445	0.000712267	0.022512	0.000694294	0.419133	6	219	112
GO:0015850	organic hydroxy compound transport	0.00941636	0.112476	0.668562	0.00419796	0.0653504	0.00399219	0.0950052	5	217	112
GO:0021772	olfactory bulb development	0.00477327	0.112476	0.338902	0.00176305	0.0360561	0.00203949	0.0418512	2	13	112
GO:0021988	olfactory lobe development	0.00564114	0.112476	0.400521	0.00205037	0.0403498	0.00216967	0.0997688	2	14	112
GO:0022008	neurogenesis	0.00373183	0.112476	0.26496	0.00218755	0.0409341	0.00190931	-0.0544305	13	1076	112
GO:0030182	neuron differentiation	0.00251681	0.101193	0.178694	0.00147909	0.0318553	0.00117162	-0.0422711	12	903	112
GO:0030516	regulation of axon extension	0.00620525	0.112476	0.440573	0.00283874	0.0493468	0.00203949	0.175016	3	58	112
GO:0030517	negative regulation of axon extension	0.00364504	0.112476	0.258798	0.000454815	0.0158124	0.00026036	0.798928	3	31	112
GO:0031175	neuron projection development	0.00446952	0.112476	0.317336	0.0040816	0.0653504	0.00407898	-0.292551	9	641	112
GO:0032501	multicellular organismal process	0.00277718	0.103884	0.197179	0.000976906	0.0282135	0.000737687	0.208608	41	5358	112
GO:0032989	cellular component morphogenesis	0.00546756	0.112476	0.388197	0.00413593	0.0653504	0.00412237	-0.194847	8	525	112
GO:0032990	cell part morphogenesis	0.00221306	0.0999783	0.157127	0.00165471	0.0345172	0.00169234	-0.267253	8	452	112
GO:0033015	tetrapyrrole catabolic process	0.00533738	0.112476	0.378954	0.00149656	0.0318553	0.00169234	0.179581	2	12	112
GO:0034329	cell junction assembly	0.00169234	0.0981558	0.120156	3.58781e-05	0.0031184	4.33934e-05	1.18765	9	332	112
GO:0034330	cell junction organization	0.00216967	0.0999783	0.154046	0.000185339	0.00878673	0.000173573	0.711701	10	507	112
GO:0042167	heme catabolic process	0.00355826	0.112476	0.252636	0.0012511	0.0303464	0.00125841	0.10245	2	11	112
GO:0043252	sodium-independent organic anion transport	0.00138859	0.0888696	0.0985897	4.78969e-09	1.24891e-06	4.33915e-05	1.08726	5	14	112
GO:0044245	polysaccharide digestion	0.000347147	0.0232588	0.0246474	0.000139557	0.00766095	0.00013018	-0.0935028	2	4	112
GO:0046149	pigment catabolic process	0.00355826	0.112476	0.252636	0.0012511	0.0303464	0.00125841	0.10245	2	11	112
GO:0046448	tropane alkaloid metabolic process	0.00486006	0.112476	0.345064	0.00485985	0.0724117	0.0052506	-0.359691	1	1	112
GO:0046942	carboxylic acid transport	0.0032979	0.112476	0.234151	0.000327256	0.0136531	0.000303754	0.681183	6	189	112
GO:0048640	negative regulation of developmental growth	0.00737687	0.112476	0.523758	0.00392099	0.0638999	0.00355826	0.0210847	3	65	112
GO:0048667	cell morphogenesis involved in neuron differentiation	0.0006509	0.0429594	0.0462139	0.000402098	0.0144617	0.0006509	-0.473417	8	363	112
GO:0048675	axon extension	0.00963333	0.112476	0.683966	0.00629606	0.09249	0.00577132	-0.0534965	3	77	112
GO:0048699	generation of neurons	0.00208288	0.0999783	0.147885	0.00120518	0.0303464	0.000954654	-0.0493814	13	1006	112
GO:0048762	mesenchymal cell differentiation	0.00121501	0.0789759	0.086266	0.000365924	0.0138698	0.00039054	0.0652265	6	193	112
GO:0048812	neuron projection morphogenesis	0.00160555	0.0963333	0.113994	0.00112128	0.0292373	0.00125841	-0.301466	8	425	112
GO:0048841	regulation of axon extension involved in axon guidance	0.00312432	0.112476	0.221827	0.000209926	0.0095197	0.00026036	0.720687	3	24	112
GO:0048843	negative regulation of axon extension involved in axon guidance	0.00312432	0.112476	0.221827	0.000119926	0.00766095	0.00013018	1.02172	3	20	112
GO:0048846	axon extension involved in axon guidance	0.0032545	0.112476	0.23107	0.000372344	0.0138698	0.000477327	0.478165	3	29	112
GO:0048858	cell projection morphogenesis	0.00212627	0.0999783	0.150966	0.00143772	0.0318553	0.00143198	-0.215007	8	442	112
GO:0048863	stem cell differentiation	0.00603168	0.112476	0.428249	0.00476063	0.0724117	0.00486006	-0.216503	4	139	112
GO:0048864	stem cell development	0.00177913	0.0981558	0.126318	0.00013861	0.00766095	0.00013018	0.735914	4	54	112
GO:0050771	negative regulation of axonogenesis	0.00433934	0.112476	0.308093	0.00111734	0.0292373	0.000867867	0.364544	3	42	112
GO:0050783	cocaine metabolic process	0.00486006	0.112476	0.345064	0.00485985	0.0724117	0.0052506	-0.359691	1	1	112
GO:0050808	synapse organization	0.00273378	0.103884	0.194099	0.000325953	0.0136531	0.000347147	0.527974	7	266	112
GO:0050877	nervous system process	0.00182252	0.0981558	0.129399	1.42087e-06	0.00021171	4.33915e-05	1.22529	15	696	112
GO:0050919	negative chemotaxis	0.00481666	0.112476	0.341983	0.000652948	0.021282	0.000867867	0.417512	3	35	112
GO:0050922	negative regulation of chemotaxis	0.00698633	0.112476	0.49603	0.00243919	0.04312	0.00290736	0.0812155	3	55	112
GO:0060485	mesenchyme development	0.00164895	0.0972879	0.117075	0.000838864	0.0257334	0.00078108	-0.0808044	6	226	112
GO:0061387	regulation of extent of cell growth	0.00689954	0.112476	0.489868	0.00375316	0.0627835	0.00312432	0.0436133	3	64	112
GO:0061564	axon development	8.67867e-05	0.00598828	0.00616186	0.000132699	0.00766095	0.000173573	-0.922067	8	308	112
GO:0071526	semaphorin-plexin signaling pathway	0.00416576	0.112476	0.295769	0.000968418	0.0282135	0.000998047	0.283126	3	40	112
GO:0097485	neuron projection guidance	0.00243003	0.101193	0.172532	0.00102791	0.0282135	0.00108483	-0.0266582	5	157	112
GO:0098742	cell-cell adhesion via plasma-membrane adhesion molecules	0.00928618	0.112476	0.659319	0.00211874	0.040923	0.00173573	0.449667	5	185	112
GO:0099054	presynapse assembly	4.33934e-05	0.00308093	0.00308093	1.93996e-05	0.00252923	4.33915e-05	-0.671801	4	33	112
GO:0099172	presynapse organization	4.33934e-05	0.00308093	0.00308093	2.19041e-05	0.00253844	4.33915e-05	-0.671801	4	34	112
GO:0099174	regulation of presynapse organization	0.00338468	0.112476	0.240312	0.00379229	0.0627835	0.00321111	-0.329767	2	19	112
GO:0099560	synaptic membrane adhesion	0.00234324	0.101193	0.16637	0.00235832	0.0424091	0.00190931	-0.29063	2	15	112
GO:0120039	plasma membrane bounded cell projection morphogenesis	0.00199609	0.0981558	0.141723	0.00137725	0.0318553	0.00138859	-0.23371	8	439	112
GO:1902284	neuron projection extension involved in neuron projection guidance	0.0032545	0.112476	0.23107	0.000372344	0.0138698	0.000477327	0.478165	3	29	112
GO:1905606	regulation of presynapse assembly	0.00338468	0.112476	0.240312	0.00379229	0.0627835	0.00321111	-0.329767	2	19	112

## Sheet: patient_SP102620_deletions
patient_SP102620_deletions
GOID: Gene Ontology Identifier. A unique identifier for each Gene Ontology term in the database.
TERM: The full name of the Gene Ontology term associated with the enrichment analysis.
P.value.cyclic: p-value from the cyclic permutation test. Indicates the probability of observing at least the same number of genes from this GO term within the analyzed loci by chance, using cyclic permutations that preserve genomic order.
P.adjust.cyclic.BH: Benjamini-Hochberg adjusted p-value from the cyclic permutation test.
P.adjust.cyclic.Bonfferroni: Bonferroni-adjusted p-value from the cyclic permutation test.
P.value.random: p-value from the random permutation test. Indicates the probability of observing at least the same number of genes from this GO term within the analyzed loci by chance, using random permutations that disrupt genomic order.
P.value.hyper: -value from the hypergeometric test. The conventional enrichment analysis method.
P.adjust.hyper.BH: Benjamini-Hochberg adjusted p-value from the hypergeometric test.
residuals: Distance between the cyclic permutation p-value and the linear regression line between cyclic and random permutation p-values.
b: The number of genes falling within the analyzed loci that belong to the specific GO term
B: The total number of genes across the entire genome belonging to the specific GO term.
n: The total number of genes found within the analyzed loci (regardless of GO term).
GOID	TERM	P.value.cyclic	P.adjust.cyclic.BH	P.adjust.cyclic.Bonfferroni	P.value.hyper	P.adjust.hyper.BH	P.value.random	residuals	b	B	n
GO:0006030	chitin metabolic process	0.0251248	0.329746	1	0.00071687	0.0700716	0.00121501	1.0905	4	6	1987
GO:0006032	chitin catabolic process	0.0251248	0.329746	1	0.00071687	0.0700716	0.00121501	1.0905	4	6	1987
GO:0006082	organic acid metabolic process	0.00551096	0.160555	0.424344	9.66895e-05	0.0186534	4.33934e-05	1.75886	100	799	1987
GO:0006629	lipid metabolic process	0.00663918	0.160555	0.511217	0.000189774	0.0331246	0.000433934	0.854474	128	1090	1987
GO:0006631	fatty acid metabolic process	0.00546756	0.160555	0.421002	9.07905e-05	0.0186534	8.67867e-05	1.45378	48	317	1987
GO:0006633	fatty acid biosynthetic process	0.00190931	0.104491	0.147017	1.06511e-05	0.00496932	4.33915e-05	1.21474	27	128	1987
GO:0006688	glycosphingolipid biosynthetic process	0.00277718	0.119419	0.213842	0.000208207	0.0338776	0.000216967	0.708098	9	26	1987
GO:0006839	mitochondrial transport	0.00295075	0.122109	0.227208	7.74325e-05	0.0177393	4.33915e-05	1.43821	37	222	1987
GO:0007156	homophilic cell adhesion via plasma membrane adhesion molecules	0.00577132	0.160555	0.444391	0.000560439	0.0684763	0.0006509	0.606469	14	61	1987
GO:0008610	lipid biosynthetic process	0.00160555	0.100239	0.123628	6.08562e-06	0.0037178	4.33934e-05	1.12577	83	590	1987
GO:0009092	homoserine metabolic process	0.0203515	0.329746	1	0.000640041	0.069002	0.000607507	1.28337	3	3	1987
GO:0009191	ribonucleoside diphosphate catabolic process	0.00112823	0.0834888	0.0868735	0.000256567	0.0354885	0.00026036	0.166505	4	5	1987
GO:0010528	regulation of transposition	0.0538078	0.422131	1	0.000208207	0.0338776	0.000216967	2.22964	9	26	1987
GO:0010529	negative regulation of transposition	0.0538078	0.422131	1	0.000208207	0.0338776	0.000216967	2.22964	9	26	1987
GO:0010872	regulation of cholesterol esterification	0.00351486	0.13708	0.270644	0.000238594	0.0354885	0.000216967	0.829024	6	12	1987
GO:0010873	positive regulation of cholesterol esterification	0.00203949	0.104491	0.157041	2.72471e-05	0.00951185	8.67867e-05	0.947551	6	9	1987
GO:0010901	regulation of very-low-density lipoprotein particle remodeling	0.00186591	0.104491	0.143675	2.64156e-05	0.00951185	4.33915e-05	1.20294	5	6	1987
GO:0010984	regulation of lipoprotein particle clearance	0.00117162	0.0855283	0.0902148	0.00014736	0.0263487	0.000173573	0.36197	9	25	1987
GO:0010985	negative regulation of lipoprotein particle clearance	0.00117162	0.0855283	0.0902148	0.000128703	0.023588	0.00013018	0.486909	6	11	1987
GO:0016053	organic acid biosynthetic process	0.000998047	0.0758516	0.0768496	4.02166e-07	0.00113795	4.33915e-05	0.881739	47	253	1987
GO:0016125	sterol metabolic process	0.00859189	0.171838	0.661575	0.000665853	0.0700716	0.000867867	0.685799	20	106	1987
GO:0016126	sterol biosynthetic process	0.00572792	0.160555	0.44105	0.000737181	0.0711089	0.000824474	0.499933	12	49	1987
GO:0016553	base conversion or substitution editing	0.0812324	0.422131	1	0.000475165	0.0590413	0.000216967	2.44108	7	18	1987
GO:0016554	cytidine to uridine editing	0.0798872	0.422131	1	3.33025e-06	0.00244141	4.33915e-05	3.1315	7	10	1987
GO:0019346	transsulfuration	0.0203515	0.329746	1	0.000640041	0.069002	0.000607507	1.28337	3	3	1987
GO:0019433	triglyceride catabolic process	0.00156216	0.100239	0.120286	6.9082e-05	0.0163368	4.33934e-05	1.11171	9	23	1987
GO:0019752	carboxylic acid metabolic process	0.00624864	0.160555	0.481146	0.000253956	0.0354885	0.00013018	1.34623	93	752	1987
GO:0032196	transposition	0.0251681	0.329746	1	1.52339e-05	0.00603525	4.33915e-05	2.53857	11	29	1987
GO:0032368	regulation of lipid transport	0.00143198	0.100239	0.110263	0.000609786	0.069002	0.000824474	-0.211711	21	113	1987
GO:0032371	regulation of sterol transport	0.00156216	0.100239	0.120286	5.82157e-05	0.0147721	8.67867e-05	0.81068	17	69	1987
GO:0032372	negative regulation of sterol transport	0.00433934	0.160555	0.334129	0.000628669	0.069002	0.00052072	0.556985	8	24	1987
GO:0032374	regulation of cholesterol transport	0.00156216	0.100239	0.120286	5.82157e-05	0.0147721	8.67867e-05	0.81068	17	69	1987
GO:0032375	negative regulation of cholesterol transport	0.00433934	0.160555	0.334129	0.000628669	0.069002	0.00052072	0.556985	8	24	1987
GO:0032488	Cdc42 protein signal transduction	0.00143198	0.100239	0.110263	0.0010301	0.0980735	0.000911261	-0.255176	6	15	1987
GO:0032489	regulation of Cdc42 protein signal transduction	0.00143198	0.100239	0.110263	0.000212573	0.0338776	0.000173573	0.464983	5	8	1987
GO:0033700	phospholipid efflux	0.00486006	0.160555	0.374224	3.77139e-05	0.01152	4.33915e-05	1.69436	7	13	1987
GO:0034367	protein-containing complex remodeling	0.00186591	0.104491	0.143675	2.10341e-06	0.00171334	4.33915e-05	1.20294	12	29	1987
GO:0034368	protein-lipid complex remodeling	0.00186591	0.104491	0.143675	8.29778e-07	0.00113795	4.33915e-05	1.20294	12	27	1987
GO:0034369	plasma lipoprotein particle remodeling	0.00186591	0.104491	0.143675	8.29778e-07	0.00113795	4.33915e-05	1.20294	12	27	1987
GO:0034370	triglyceride-rich lipoprotein particle remodeling	0.00151877	0.100239	0.116945	1.08657e-06	0.00113795	4.33915e-05	1.09727	8	12	1987
GO:0034371	chylomicron remodeling	0.00208288	0.104491	0.160382	0.000640041	0.069002	0.000824474	-0.0193646	3	3	1987
GO:0034372	very-low-density lipoprotein particle remodeling	0.00151877	0.100239	0.116945	1.08657e-06	0.00113795	4.33915e-05	1.09727	8	12	1987
GO:0034375	high-density lipoprotein particle remodeling	0.0019527	0.104491	0.150358	0.000121123	0.0227681	0.000303754	0.381161	7	15	1987
GO:0034377	plasma lipoprotein particle assembly	0.00451291	0.160555	0.347494	0.000319557	0.0422459	0.00026036	0.878149	8	22	1987
GO:0034380	high-density lipoprotein particle assembly	0.00186591	0.104491	0.143675	0.000238594	0.0354885	0.000303754	0.357823	6	12	1987
GO:0034381	plasma lipoprotein particle clearance	0.00147537	0.100239	0.113604	5.67447e-05	0.0147721	0.000173573	0.480308	13	44	1987
GO:0034382	chylomicron remnant clearance	0.0193968	0.329746	1	0.00071687	0.0700716	0.000477327	1.36345	4	6	1987
GO:0034384	high-density lipoprotein particle clearance	0.00256021	0.112649	0.197136	0.000238594	0.0354885	8.67867e-05	1.06428	6	12	1987
GO:0034656	nucleobase-containing small molecule catabolic process	0.000303754	0.023389	0.023389	9.55498e-05	0.0186534	8.67867e-05	-0.0299739	8	19	1987
GO:0039692	single stranded viral RNA replication via double stranded DNA intermediate	0.0362335	0.362335	1	1.07368e-05	0.00496932	4.33915e-05	2.72563	9	19	1987
GO:0039694	viral RNA genome replication	0.0384031	0.362335	1	0.000322708	0.0422459	0.000433934	1.75547	10	33	1987
GO:0042178	xenobiotic catabolic process	0.0164461	0.29603	1	3.17122e-05	0.0105674	4.33915e-05	2.32014	11	31	1987
GO:0042271	susceptibility to natural killer cell mediated cytotoxicity	0.00507702	0.160555	0.390931	0.000640041	0.069002	0.000998047	0.355035	3	3	1987
GO:0043436	oxoacid metabolic process	0.00464309	0.160555	0.357518	5.28861e-05	0.0147721	4.33934e-05	1.6709	99	777	1987
GO:0043691	reverse cholesterol transport	0.00676936	0.160555	0.521241	0.000696608	0.0700716	0.000564114	0.750499	7	19	1987
GO:0044248	cellular catabolic process	0.00620525	0.160555	0.477804	0.000472284	0.0590413	0.000347147	0.916686	197	1825	1987
GO:0044255	cellular lipid metabolic process	0.00594489	0.160555	0.457757	0.000267646	0.0363354	0.000433934	0.797772	102	841	1987
GO:0044281	small molecule metabolic process	0.00516381	0.160555	0.397613	6.04506e-05	0.0147721	8.67867e-05	1.42443	164	1421	1987
GO:0044283	small molecule biosynthetic process	0.00134519	0.0955088	0.10358	1.56418e-05	0.00603525	4.33915e-05	1.03497	72	505	1987
GO:0045006	DNA deamination	0.0801475	0.422131	1	3.77139e-05	0.01152	4.33934e-05	3.13315	7	13	1987
GO:0045091	regulation of single stranded viral RNA replication via double stranded DNA intermediate	0.0598828	0.422131	1	5.9839e-05	0.0147721	0.000216967	2.28455	8	18	1987
GO:0045869	negative regulation of single stranded viral RNA replication via double stranded DNA intermediate	0.0527663	0.422131	1	1.11446e-05	0.00496932	4.33915e-05	2.91859	8	15	1987
GO:0046394	carboxylic acid biosynthetic process	0.000998047	0.0758516	0.0768496	4.38166e-07	0.00113795	4.33915e-05	0.881739	46	246	1987
GO:0051004	regulation of lipoprotein lipase activity	0.00221306	0.104491	0.170406	9.55498e-05	0.0186534	0.000173573	0.68845	8	19	1987
GO:0051410	detoxification of nitrogen compound	0.00290736	0.122109	0.223866	0.000256567	0.0354885	0.00026036	0.652433	4	5	1987
GO:0055090	acylglycerol homeostasis	0.00173573	0.102408	0.133652	8.40943e-05	0.0181322	8.67867e-05	0.864766	11	34	1987
GO:0065005	protein-lipid complex assembly	0.00451291	0.160555	0.347494	0.000628669	0.069002	0.00039054	0.702057	8	24	1987
GO:0070328	triglyceride homeostasis	0.00173573	0.102408	0.133652	8.40943e-05	0.0181322	8.67867e-05	0.864766	11	34	1987
GO:0070383	DNA cytosine deamination	0.0795834	0.422131	1	1.08009e-06	0.00113795	4.33915e-05	3.12954	7	9	1987
GO:0070458	cellular detoxification of nitrogen compound	0.00290736	0.122109	0.223866	0.000256567	0.0354885	0.00026036	0.652433	4	5	1987
GO:0071825	protein-lipid complex subunit organization	0.00186591	0.104491	0.143675	8.52692e-06	0.00480853	4.33934e-05	1.20292	14	43	1987
GO:0071827	plasma lipoprotein particle organization	0.00186591	0.104491	0.143675	4.52037e-06	0.00301262	4.33934e-05	1.20292	14	41	1987
GO:0071830	triglyceride-rich lipoprotein particle clearance	0.0193968	0.329746	1	0.00071687	0.0700716	0.000477327	1.36345	4	6	1987
GO:0072330	monocarboxylic acid biosynthetic process	0.00182252	0.103884	0.140334	1.15235e-05	0.00496932	4.33915e-05	1.19086	33	173	1987
GO:0097006	regulation of plasma lipoprotein particle levels	0.00151877	0.100239	0.116945	1.8257e-06	0.00167303	4.33915e-05	1.09727	20	72	1987
GO:1901071	glucosamine-containing compound metabolic process	0.0120634	0.229204	0.928878	0.000453144	0.0582807	0.000564114	1.04709	8	23	1987
GO:1903955	positive regulation of protein targeting to mitochondrion	0.00360165	0.13708	0.277327	0.000695005	0.0700716	0.00078108	0.285243	9	30	1987

## Sheet: HiC_B_to_A_compartments_ESC_to_
HiC_B_to_A_compartments_ESC_to_NPC
GOID: Gene Ontology Identifier. A unique identifier for each Gene Ontology term in the database.
TERM: The full name of the Gene Ontology term associated with the enrichment analysis.
P.value.cyclic: p-value from the cyclic permutation test. Indicates the probability of observing at least the same number of genes from this GO term within the analyzed loci by chance, using cyclic permutations that preserve genomic order.
P.adjust.cyclic.BH: Benjamini-Hochberg adjusted p-value from the cyclic permutation test.
P.adjust.cyclic.Bonfferroni: Bonferroni-adjusted p-value from the cyclic permutation test.
P.value.random: p-value from the random permutation test. Indicates the probability of observing at least the same number of genes from this GO term within the analyzed loci by chance, using random permutations that disrupt genomic order.
P.value.hyper: -value from the hypergeometric test. The conventional enrichment analysis method.
P.adjust.hyper.BH: Benjamini-Hochberg adjusted p-value from the hypergeometric test.
residuals: Distance between the cyclic permutation p-value and the linear regression line between cyclic and random permutation p-values.
b: The number of genes falling within the analyzed loci that belong to the specific GO term
B: The total number of genes across the entire genome belonging to the specific GO term.
n: The total number of genes found within the analyzed loci (regardless of GO term).
GOID	TERM	P.value.cyclic	P.adjust.cyclic.BH	P.adjust.cyclic.Bonfferroni	P.value.hyper	P.adjust.hyper.BH	P.value.random	residuals	b	B	n
GO:0000003	reproduction	0.00354885	0.206975	0.450704	0.0020226	0.0520386	0.0018764	0.0226522	15	1460	109
GO:0000904	cell morphogenesis involved in differentiation	0.0037936	0.206975	0.481787	0.00359517	0.0748354	0.00326331	-0.184806	10	820	109
GO:0001935	endothelial cell proliferation	0.000163165	0.0199062	0.020722	6.4191e-14	1.28453e-11	4.07897e-05	0.167405	14	179	109
GO:0001936	regulation of endothelial cell proliferation	0.000122374	0.0152968	0.0155415	1.89548e-14	4.87681e-12	4.07897e-05	0.0255986	14	164	109
GO:0001937	negative regulation of endothelial cell proliferation	0.000163165	0.0199062	0.020722	3.98256e-18	2.39086e-15	4.07897e-05	0.167405	13	69	109
GO:0002174	mammary stem cell proliferation	0.00444626	0.215868	0.564675	0.00444608	0.0748354	0.00432388	-0.228771	1	1	109
GO:0003197	endocardial cushion development	0.0018764	0.136977	0.238303	0.00143937	0.0418446	0.00134611	-0.14723	3	50	109
GO:0003359	noradrenergic neuron fate commitment	0.00444626	0.215868	0.564675	0.00444608	0.0748354	0.00448705	-0.244857	1	1	109
GO:0003407	neural retina development	0.0075464	0.215868	0.958393	0.00567219	0.0844266	0.00542525	-0.0665544	3	81	109
GO:0006935	chemotaxis	0.00901489	0.215868	1	0.00491937	0.0759743	0.00444626	0.107516	8	591	109
GO:0007156	homophilic cell adhesion via plasma membrane adhesion molecules	0.00399755	0.206975	0.507689	0.00305672	0.0705788	0.00338568	-0.174981	3	65	109
GO:0007166	cell surface receptor signaling pathway	0.00167245	0.127106	0.212401	0.000508388	0.0203468	0.000489496	0.235382	23	2484	109
GO:0007259	receptor signaling pathway via JAK-STAT	0.000652662	0.0626555	0.082888	7.58751e-10	6.5072e-08	4.07897e-05	0.850746	11	187	109
GO:0007275	multicellular organism development	0.00175403	0.129798	0.222762	0.000768228	0.0266073	0.000693453	0.107592	38	5229	109
GO:0007400	neuroblast fate determination	0.00444626	0.215868	0.564675	0.00444608	0.0748354	0.00448705	-0.244857	1	1	109
GO:0007409	axonogenesis	0.00652662	0.215868	0.82888	0.00573637	0.0846819	0.00530288	-0.12821	7	481	109
GO:0007411	axon guidance	0.00138691	0.112339	0.176137	0.000875161	0.0291882	0.000978992	-0.157929	6	249	109
GO:0007565	female pregnancy	0.000530288	0.0572711	0.0673465	9.57187e-12	1.14926e-09	4.07897e-05	0.748395	12	164	109
GO:0007589	body fluid secretion	0.000571079	0.0599633	0.072527	2.89051e-12	4.33817e-10	4.07897e-05	0.784925	11	112	109
GO:0007595	lactation	0.000571079	0.0599633	0.072527	1.87311e-15	8.43366e-13	4.07897e-05	0.784925	11	59	109
GO:0007596	blood coagulation	0.00681216	0.215868	0.865144	0.00424227	0.0748354	0.00432388	-0.0184655	4	147	109
GO:0007599	hemostasis	0.0070569	0.215868	0.896227	0.00455678	0.0756128	0.00477259	-0.0439463	4	150	109
GO:0008283	cell population proliferation	0.000775036	0.0674281	0.0984295	0.000261385	0.0112084	0.000163165	0.333378	21	2060	109
GO:0008284	positive regulation of cell population proliferation	0.000856618	0.0728126	0.108791	3.41132e-05	0.00175537	4.07897e-05	0.984789	15	994	109
GO:0008285	negative regulation of cell population proliferation	0.000122374	0.0152968	0.0155415	3.83227e-08	2.76077e-06	4.07897e-05	0.0255986	17	754	109
GO:0009605	response to external stimulus	0.000530288	0.0572711	0.0673465	5.50704e-05	0.00275505	4.07914e-05	0.748377	26	2596	109
GO:0009891	positive regulation of biosynthetic process	0.00681216	0.215868	0.865144	0.00492276	0.0759743	0.00542525	-0.117011	17	1927	109
GO:0009893	positive regulation of metabolic process	0.00954518	0.215868	1	0.00549328	0.082445	0.00562921	0.0332388	27	3701	109
GO:0009967	positive regulation of signal transduction	0.00130532	0.107037	0.165776	0.000395973	0.0162079	0.000407914	0.192399	17	1524	109
GO:0009991	response to extracellular stimulus	0.000652662	0.0626555	0.082888	1.1745e-06	7.55455e-05	4.07897e-05	0.850746	11	384	109
GO:0010557	positive regulation of macromolecule biosynthetic process	0.00668978	0.215868	0.849602	0.00493559	0.0759743	0.00534367	-0.119366	16	1765	109
GO:0010596	negative regulation of endothelial cell migration	0.0018764	0.136977	0.238303	0.00189588	0.0502128	0.00175403	-0.262184	3	55	109
GO:0010633	negative regulation of epithelial cell migration	0.00452784	0.215868	0.575036	0.00408091	0.0748354	0.00363043	-0.143892	3	72	109
GO:0010646	regulation of cell communication	0.00261065	0.174913	0.331552	0.00146375	0.0418446	0.0014277	-0.00999877	27	3373	109
GO:0010647	positive regulation of cell communication	0.000285539	0.0342647	0.0362635	2.40708e-05	0.00144505	4.07914e-05	0.443236	22	1883	109
GO:0010755	regulation of plasminogen activation	0.00171324	0.128493	0.217581	0.00172128	0.04697	0.00146849	-0.22986	2	14	109
GO:0010842	retina layer formation	0.00505813	0.215868	0.642382	0.00507146	0.0774042	0.00526208	-0.2505	2	24	109
GO:0014017	neuroblast fate commitment	0.00444626	0.215868	0.564675	0.00444608	0.0748354	0.00448705	-0.244857	1	1	109
GO:0021872	forebrain generation of neurons	0.00905568	0.215868	1	0.00648288	0.0934053	0.00632266	-0.0431633	3	85	109
GO:0021879	forebrain neuron differentiation	0.00730165	0.215868	0.92731	0.00457624	0.0756128	0.00395676	0.0542737	3	75	109
GO:0021953	central nervous system neuron differentiation	0.00191719	0.136977	0.243484	0.000692103	0.0249295	0.000734244	0.126613	6	238	109
GO:0021954	central nervous system neuron development	0.000122374	0.0152968	0.0155415	8.93799e-05	0.00423614	4.07914e-05	0.0255808	5	101	109
GO:0021955	central nervous system neuron axonogenesis	0.00110137	0.0925148	0.139874	0.000926965	0.0303539	0.00061187	-0.0674403	3	43	109
GO:0022414	reproductive process	0.00354885	0.206975	0.450704	0.00200924	0.0520386	0.00183561	0.0321975	15	1459	109
GO:0023051	regulation of signaling	0.00277381	0.183072	0.352274	0.00152966	0.0423834	0.0014277	0.0198847	27	3383	109
GO:0023056	positive regulation of signaling	0.000285539	0.0342647	0.0362635	2.52736e-05	0.00146832	4.07914e-05	0.443236	22	1889	109
GO:0030182	neuron differentiation	0.00252906	0.174505	0.321191	0.00144769	0.0418446	0.00114216	0.0712615	16	1560	109
GO:0030194	positive regulation of blood coagulation	0.00318173	0.197267	0.404079	0.00353189	0.0748354	0.00416072	-0.377017	2	20	109
GO:0030879	mammary gland development	0.000367122	0.042219	0.0466245	4.82027e-13	8.6813e-11	4.07897e-05	0.567134	13	165	109
GO:0031175	neuron projection development	0.00465021	0.215868	0.590577	0.00431781	0.0748354	0.00465021	-0.238262	12	1126	109
GO:0031290	retinal ganglion cell axon guidance	0.00350806	0.206975	0.445523	0.00389237	0.0748354	0.00346726	-0.249708	2	21	109
GO:0031328	positive regulation of cellular biosynthetic process	0.00530288	0.215868	0.673465	0.00386339	0.0748354	0.00428309	-0.137807	17	1881	109
GO:0031638	zymogen activation	0.0199878	0.215868	1	0.0062741	0.0911263	0.00689374	0.309545	3	84	109
GO:0031639	plasminogen activation	0.00155007	0.120906	0.196859	0.000206315	0.00906275	0.000285539	0.43201	3	26	109
GO:0031667	response to nutrient levels	0.00061187	0.0599633	0.0777075	4.86889e-07	3.24773e-05	4.07897e-05	0.818933	11	351	109
GO:0032879	regulation of localization	0.0037528	0.206975	0.476606	0.00301497	0.0705189	0.00314093	-0.173536	23	2837	109
GO:0032989	cellular component morphogenesis	0.00469101	0.215868	0.595758	0.00425673	0.0748354	0.00440547	-0.210475	10	840	109
GO:0032990	cell part morphogenesis	0.00203957	0.14277	0.259025	0.00180435	0.0485019	0.00155007	-0.167398	10	745	109
GO:0036289	peptidyl-serine autophosphorylation	0.000652662	0.0626555	0.082888	0.000690909	0.0249295	0.000530288	-0.263215	2	9	109
GO:0042127	regulation of cell population proliferation	0.000448705	0.0498062	0.0569855	6.43015e-05	0.00312992	4.07914e-05	0.666032	20	1720	109
GO:0042330	taxis	0.0094228	0.215868	1	0.00516989	0.0782435	0.00481338	0.0948754	8	596	109
GO:0042711	maternal behavior	0.00481338	0.215868	0.611299	0.00255017	0.061238	0.00256986	0.0363019	2	17	109
GO:0042730	fibrinolysis	0.00693453	0.215868	0.880685	0.00225668	0.0572434	0.00191719	0.343519	2	16	109
GO:0043542	endothelial cell migration	0.00358964	0.206975	0.455884	0.00311163	0.0709374	0.00277381	-0.141465	5	221	109
GO:0044703	multi-organism reproductive process	0.0037528	0.206975	0.476606	0.00116328	0.0367556	0.00110137	0.281591	12	960	109
GO:0044706	multi-multicellular organism process	0.000571079	0.0599633	0.072527	7.29322e-11	6.9132e-09	4.07897e-05	0.784925	12	195	109
GO:0045893	positive regulation of transcription, DNA-templated	0.00526208	0.215868	0.668285	0.00320145	0.0711824	0.00342647	-0.0447034	15	1532	109
GO:0045944	positive regulation of transcription by RNA polymerase II	0.00681216	0.215868	0.865144	0.00354702	0.0748354	0.00358964	0.0623577	13	1245	109
GO:0046425	regulation of receptor signaling pathway via JAK-STAT	0.000652662	0.0626555	0.082888	1.0629e-11	1.19642e-09	4.07897e-05	0.850746	11	126	109
GO:0046427	positive regulation of receptor signaling pathway via JAK-STAT	0.000571079	0.0599633	0.072527	3.36443e-15	1.21187e-12	4.07897e-05	0.784925	11	62	109
GO:0046903	secretion	0.00252906	0.174505	0.321191	0.000759746	0.0266073	0.00114216	0.0712615	13	1046	109
GO:0048513	animal organ development	0.000448705	0.0498062	0.0569855	0.000135654	0.00626443	4.07914e-05	0.666032	31	3572	109
GO:0048584	positive regulation of response to stimulus	0.00575158	0.215868	0.730451	0.00241588	0.0602303	0.00203957	0.22445	19	2118	109
GO:0048666	neuron development	0.00550683	0.215868	0.699368	0.00462449	0.075647	0.00460942	-0.151093	13	1285	109
GO:0048667	cell morphogenesis involved in neuron differentiation	0.00293698	0.187967	0.372996	0.00248467	0.0604715	0.00228432	-0.15606	9	650	109
GO:0048699	generation of neurons	0.00615949	0.215868	0.782256	0.00430488	0.0748354	0.00391597	-0.0250755	16	1740	109
GO:0048731	system development	0.00350806	0.206975	0.445523	0.0014984	0.042166	0.00138691	0.148232	35	4839	109
GO:0048732	gland development	0.000326331	0.0381807	0.041444	2.46546e-08	1.85013e-06	4.07897e-05	0.509075	14	473	109
GO:0048812	neuron projection morphogenesis	0.00126453	0.104956	0.160596	0.00116179	0.0367556	0.00106058	-0.238224	10	702	109
GO:0048856	anatomical structure development	0.00905568	0.215868	1	0.00488444	0.0759743	0.00509892	0.0502584	38	5769	109
GO:0048858	cell projection morphogenesis	0.00163165	0.125637	0.20722	0.00143214	0.0418446	0.00118295	-0.160006	10	722	109
GO:0050673	epithelial cell proliferation	0.000326331	0.0381807	0.041444	2.4221e-09	1.89661e-07	4.07897e-05	0.509075	15	466	109
GO:0050678	regulation of epithelial cell proliferation	0.000285539	0.0342647	0.0362635	2.89759e-10	2.60928e-08	4.07897e-05	0.443254	15	399	109
GO:0050680	negative regulation of epithelial cell proliferation	8.15827e-05	0.010361	0.010361	3.13117e-14	7.04904e-12	4.07897e-05	-0.174266	14	170	109
GO:0050793	regulation of developmental process	0.000407914	0.0465021	0.051805	0.000148747	0.00669735	8.15827e-05	0.318021	25	2596	109
GO:0050808	synapse organization	0.00738323	0.215868	0.937671	0.00619333	0.0906845	0.00571079	-0.0996055	7	488	109
GO:0050817	coagulation	0.00713849	0.215868	0.906588	0.00477496	0.0759743	0.00493575	-0.0528799	4	152	109
GO:0050820	positive regulation of coagulation	0.00440547	0.215868	0.559494	0.00466231	0.075647	0.00493575	-0.290793	2	23	109
GO:0050878	regulation of body fluid levels	8.15827e-05	0.010361	0.010361	3.10702e-11	3.10875e-09	4.07897e-05	-0.174266	15	340	109
GO:0051046	regulation of secretion	0.000775036	0.0674281	0.0984295	3.07529e-05	0.001629	4.07914e-05	0.935438	13	754	109
GO:0051047	positive regulation of secretion	0.00061187	0.0599633	0.0777075	2.96543e-07	2.05413e-05	4.07897e-05	0.818933	12	410	109
GO:0051049	regulation of transport	0.010361	0.215868	1	0.00700818	0.0993837	0.00795431	-0.0764903	16	1832	109
GO:0051050	positive regulation of transport	0.00505813	0.215868	0.642382	0.00244132	0.0602303	0.00277381	0.0275812	12	1049	109
GO:0051094	positive regulation of developmental process	0.000530288	0.0572711	0.0673465	2.61406e-05	0.00147123	4.07914e-05	0.748377	19	1478	109
GO:0051240	positive regulation of multicellular organismal process	0.000407914	0.0465021	0.051805	1.00851e-05	0.000626323	4.07914e-05	0.619051	21	1644	109
GO:0051254	positive regulation of RNA metabolic process	0.00917805	0.215868	1	0.00686021	0.0980575	0.00685295	-0.0715243	15	1665	109
GO:0051704	multi-organism process	0.00297777	0.187967	0.378177	0.00056957	0.0218254	0.000489496	0.519745	13	1014	109
GO:0051917	regulation of fibrinolysis	0.00277381	0.183072	0.352274	0.000690909	0.0249295	0.000734244	0.30868	2	9	109
GO:0051918	negative regulation of fibrinolysis	0.000448705	0.0498062	0.0569855	0.000290402	0.0121631	0.000326331	-0.237058	2	6	109
GO:0060165	regulation of timing of subpallium neuron differentiation	0.00444626	0.215868	0.564675	0.00444608	0.0748354	0.00448705	-0.244857	1	1	109
GO:0060291	long-term synaptic potentiation	0.0108913	0.215868	1	0.00489716	0.0759743	0.00530288	0.124205	5	246	109
GO:0060746	parental behavior	0.00538446	0.215868	0.683826	0.00286063	0.0677894	0.00285539	0.04581	2	18	109
GO:0061100	lung neuroendocrine cell differentiation	0.00444626	0.215868	0.564675	0.00444608	0.0748354	0.00448705	-0.244857	1	1	109
GO:0061103	carotid body glomus cell differentiation	0.00444626	0.215868	0.564675	0.00444608	0.0748354	0.00448705	-0.244857	1	1	109
GO:0061614	pri-miRNA transcription by RNA polymerase II	0.000652662	0.0626555	0.082888	4.69223e-12	6.03622e-10	4.07897e-05	0.850746	10	85	109
GO:0072376	protein activation cascade	0.00383439	0.206975	0.486967	0.00125567	0.0389907	0.00130532	0.218406	2	12	109
GO:0072378	blood coagulation, fibrin clot formation	0.00338568	0.203141	0.429982	0.000538939	0.0211006	0.000693453	0.43176	2	8	109
GO:0072560	type B pancreatic cell maturation	0.00444626	0.215868	0.564675	0.00444608	0.0748354	0.00509892	-0.300375	1	1	109
GO:0090248	cell migration involved in somitogenic axis elongation	0.00444626	0.215868	0.564675	0.00444608	0.0748354	0.00465021	-0.26037	1	1	109
GO:0090249	regulation of cell migration involved in somitogenic axis elongation	0.00444626	0.215868	0.564675	0.00444608	0.0748354	0.00465021	-0.26037	1	1	109
GO:0097485	neuron projection guidance	0.00138691	0.112339	0.176137	0.000875161	0.0291882	0.000978992	-0.157929	6	249	109
GO:0097696	receptor signaling pathway via STAT	0.000652662	0.0626555	0.082888	1.12011e-09	9.16962e-08	4.07897e-05	0.850746	11	194	109
GO:0120039	plasma membrane bounded cell projection morphogenesis	0.00150928	0.119233	0.191679	0.00136018	0.04152	0.00114216	-0.183195	10	717	109
GO:1900048	positive regulation of hemostasis	0.00318173	0.197267	0.404079	0.00353189	0.0748354	0.00416072	-0.377017	2	20	109
GO:1902680	positive regulation of RNA biosynthetic process	0.00530288	0.215868	0.673465	0.00324095	0.0711824	0.00354885	-0.056137	15	1534	109
GO:1902893	regulation of pri-miRNA transcription by RNA polymerase II	0.000652662	0.0626555	0.082888	3.67427e-12	5.09028e-10	4.07897e-05	0.850746	10	83	109
GO:1902895	positive regulation of pri-miRNA transcription by RNA polymerase II	0.000652662	0.0626555	0.082888	5.40815e-13	8.85462e-11	4.07897e-05	0.850746	10	69	109
GO:1903487	regulation of lactation	0.000571079	0.0599633	0.072527	1.61059e-19	1.45033e-16	4.07897e-05	0.784925	11	28	109
GO:1903489	positive regulation of lactation	0.000571079	0.0599633	0.072527	9.81455e-20	1.45033e-16	4.07897e-05	0.784925	11	27	109
GO:1903508	positive regulation of nucleic acid-templated transcription	0.00526208	0.215868	0.668285	0.00320145	0.0711824	0.00342647	-0.0447034	15	1532	109
GO:1904675	regulation of somatic stem cell division	0.00444626	0.215868	0.564675	0.00444608	0.0748354	0.00432388	-0.228771	1	1	109
GO:1904677	positive regulation of somatic stem cell division	0.00444626	0.215868	0.564675	0.00444608	0.0748354	0.00432388	-0.228771	1	1	109
GO:1904892	regulation of receptor signaling pathway via STAT	0.000652662	0.0626555	0.082888	2.08813e-11	2.21219e-09	4.07897e-05	0.850746	11	134	109
GO:1904894	positive regulation of receptor signaling pathway via STAT	0.000571079	0.0599633	0.072527	9.92655e-15	2.97962e-12	4.07897e-05	0.784925	11	68	109
GO:2000026	regulation of multicellular organismal development	0.000407914	0.0465021	0.051805	2.78921e-05	0.00152223	4.07914e-05	0.619051	19	1485	109
GO:2000101	regulation of mammary stem cell proliferation	0.00444626	0.215868	0.564675	0.00444608	0.0748354	0.00432388	-0.228771	1	1	109
GO:2000103	positive regulation of mammary stem cell proliferation	0.00444626	0.215868	0.564675	0.00444608	0.0748354	0.00432388	-0.228771	1	1	109

## Sheet: Liver LAD
Liver LAD
GOID: Gene Ontology Identifier. A unique identifier for each Gene Ontology term in the database.
TERM: The full name of the Gene Ontology term associated with the enrichment analysis.
P.value.cyclic: p-value from the cyclic permutation test. Indicates the probability of observing at least the same number of genes from this GO term within the analyzed loci by chance, using cyclic permutations that preserve genomic order.
P.adjust.cyclic.BH: Benjamini-Hochberg adjusted p-value from the cyclic permutation test.
P.adjust.cyclic.Bonfferroni: Bonferroni-adjusted p-value from the cyclic permutation test.
P.value.random: p-value from the random permutation test. Indicates the probability of observing at least the same number of genes from this GO term within the analyzed loci by chance, using random permutations that disrupt genomic order.
P.value.hyper: -value from the hypergeometric test. The conventional enrichment analysis method.
P.adjust.hyper.BH: Benjamini-Hochberg adjusted p-value from the hypergeometric test.
residuals: Distance between the cyclic permutation p-value and the linear regression line between cyclic and random permutation p-values.
b: The number of genes falling within the analyzed loci that belong to the specific GO term
B: The total number of genes across the entire genome belonging to the specific GO term.
n: The total number of genes found within the analyzed loci (regardless of GO term).
GOID	TERM	P.value.cyclic	P.adjust.cyclic.BH	P.adjust.cyclic.Bonfferroni	P.value.hyper	P.adjust.hyper.BH	P.value.random	residuals	b	B	n
GO:0007600	sensory perception	0.994544	1	1	0.999922	2.93916e-06	0.0121593	0.0151307	249	364	16719
GO:0007606	sensory perception of chemical stimulus	0.992835	1	1	0.999922	1.09587e-09	6.80045e-06	0.014366	121	151	16719
GO:0007608	sensory perception of smell	0.993146	1	1	0.999922	1.40349e-10	1.74187e-06	0.014505	93	109	16719
